# Supplementary material for: Identification and validation of biomarkers associated with mitochondria and programmed cell death in Barrett's esophagus
Source: Research Square preprint supplement (doi:10.21203/rs.3.rs-7451895/v1), 2025-09-04
Supplement: Supplementary file 1 [file a30ed812268b06cdcd782372.xlsx]

## Sheet: 02.GO
ONTOLOGY	ID	Description	pvalue	p.adjust	geneID	Count
BP	GO:0010821	regulation of mitochondrion organization	1.32512e-15	2.27655e-12	PLAUR/VPS13C/HIP1R/MAPT/CLU/FZD5/DCN/PMAIP1/GPER1/BNIP3/ACAA2	11
BP	GO:2000116	regulation of cysteine-type endopeptidase activity	1.92917e-13	1.23163e-10	PLAUR/HIP1R/MAPT/PMAIP1/FYN/TP63/GPER1/SFN/PERP/IFI6/CRYAB	11
BP	GO:0008637	apoptotic mitochondrial changes	2.1507e-13	1.23163e-10	PLAUR/HIP1R/CLU/PMAIP1/GPER1/SFN/IFI6/BNIP3/ACAA2	9
BP	GO:0001836	release of cytochrome c from mitochondria	6.86503e-12	2.94853e-09	PLAUR/CLU/PMAIP1/GPER1/SFN/IFI6/BNIP3	7
BP	GO:0043281	regulation of cysteine-type endopeptidase activity involved in apoptotic process	7.21878e-11	2.48037e-08	PLAUR/HIP1R/MAPT/PMAIP1/TP63/GPER1/SFN/IFI6/CRYAB	9
BP	GO:0052548	regulation of endopeptidase activity	1.26356e-10	3.61798e-08	PLAUR/HIP1R/MAPT/PMAIP1/FYN/TP63/GPER1/SFN/PERP/IFI6/CRYAB	11
BP	GO:0052547	regulation of peptidase activity	2.65571e-10	6.51787e-08	PLAUR/HIP1R/MAPT/PMAIP1/FYN/TP63/GPER1/SFN/PERP/IFI6/CRYAB	11
BP	GO:0097193	intrinsic apoptotic signaling pathway	1.97903e-09	4.24996e-07	PLAUR/CLU/PMAIP1/TP63/TP53BP2/SFN/PERP/IFI6/BNIP3	9
BP	GO:0010822	positive regulation of mitochondrion organization	4.24826e-09	8.10946e-07	PLAUR/HIP1R/DCN/PMAIP1/GPER1/BNIP3	6
BP	GO:0090199	regulation of release of cytochrome c from mitochondria	2.01217e-08	3.45691e-06	PLAUR/CLU/PMAIP1/GPER1/BNIP3	5
BP	GO:0010506	regulation of autophagy	1.33269e-07	2.03724e-05	VPS13C/MAPT/FZD5/DCN/TICAM1/NOD2/BAG3/BNIP3	8
BP	GO:0090200	positive regulation of release of cytochrome c from mitochondria	1.48629e-07	2.03724e-05	PLAUR/PMAIP1/GPER1/BNIP3	4
BP	GO:0051881	regulation of mitochondrial membrane potential	1.54157e-07	2.03724e-05	MAPT/DCN/PMAIP1/IFI6/BNIP3	5
BP	GO:0072593	reactive oxygen species metabolic process	1.69655e-07	2.08191e-05	MAPT/PMAIP1/FYN/ALOX12/IFI6/CRYAB/BNIP3	7
BP	GO:2001056	positive regulation of cysteine-type endopeptidase activity	1.90548e-07	2.18241e-05	HIP1R/MAPT/PMAIP1/FYN/GPER1/PERP	6
BP	GO:0010950	positive regulation of endopeptidase activity	6.05946e-07	6.50635e-05	HIP1R/MAPT/PMAIP1/FYN/GPER1/PERP	6
BP	GO:0042391	regulation of membrane potential	7.38771e-07	7.46593e-05	MAPT/YWHAH/DCN/PMAIP1/SLC39A8/GPER1/IFI6/BNIP3	8
BP	GO:0010917	negative regulation of mitochondrial membrane potential	8.68615e-07	7.85411e-05	MAPT/PMAIP1/BNIP3	3
BP	GO:0045837	negative regulation of membrane potential	8.68615e-07	7.85411e-05	MAPT/PMAIP1/BNIP3	3
BP	GO:0006839	mitochondrial transport	9.83187e-07	8.44557e-05	HIP1R/FZD5/PMAIP1/BAG3/BNIP3/ACAA2	6
BP	GO:0010952	positive regulation of peptidase activity	1.14502e-06	9.36733e-05	HIP1R/MAPT/PMAIP1/FYN/GPER1/PERP	6
BP	GO:0032386	regulation of intracellular transport	1.87517e-06	0.000146433	FZD5/MAP2K1/FYN/BAG3/SFN/IFI27/CRYAB	7
BP	GO:0010823	negative regulation of mitochondrion organization	2.22108e-06	0.000165905	MAPT/CLU/BNIP3/ACAA2	4
BP	GO:0045862	positive regulation of proteolysis	3.6761e-06	0.000261702	HIP1R/MAPT/CLU/PMAIP1/FYN/GPER1/PERP	7
BP	GO:2001233	regulation of apoptotic signaling pathway	3.80823e-06	0.000261702	PLAUR/CLU/PMAIP1/TP63/GPER1/IFI6/ACAA2	7
BP	GO:0046902	regulation of mitochondrial membrane permeability	4.51891e-06	0.000298595	HIP1R/PMAIP1/BNIP3/ACAA2	4
BP	GO:0010508	positive regulation of autophagy	5.57269e-06	0.000354588	DCN/TICAM1/NOD2/BAG3/BNIP3	5
BP	GO:0042058	regulation of epidermal growth factor receptor signaling pathway	9.17985e-06	0.000551636	PLAUR/HIP1R/GPER1/IFI6	4
BP	GO:0016241	regulation of macroautophagy	9.31167e-06	0.000551636	VPS13C/DCN/NOD2/BAG3/BNIP3	5
BP	GO:0016239	positive regulation of macroautophagy	9.68472e-06	0.000554612	DCN/NOD2/BAG3/BNIP3	4
BP	GO:0070841	inclusion body assembly	1.0486e-05	0.000577439	MAPT/CLU/BAG3	3
BP	GO:0090559	regulation of membrane permeability	1.07556e-05	0.000577439	HIP1R/PMAIP1/BNIP3/ACAA2	4
BP	GO:0043154	negative regulation of cysteine-type endopeptidase activity involved in apoptotic process	1.13226e-05	0.000589459	PLAUR/SFN/IFI6/CRYAB	4
BP	GO:1901184	regulation of ERBB signaling pathway	1.25223e-05	0.000632744	PLAUR/HIP1R/GPER1/IFI6	4
BP	GO:0072332	intrinsic apoptotic signaling pathway by p53 class mediator	1.31561e-05	0.000645776	PMAIP1/TP63/TP53BP2/PERP	4
BP	GO:0061436	establishment of skin barrier	1.50981e-05	0.000720513	ALOX12/TP63/SFN	3
BP	GO:0022411	cellular component disassembly	2.01345e-05	0.000919767	MMP2/VPS13C/PRKCA/FZD5/MMP1/GPER1/BNIP3	7
BP	GO:2000117	negative regulation of cysteine-type endopeptidase activity	2.08676e-05	0.000919767	PLAUR/SFN/IFI6/CRYAB	4
BP	GO:0090140	regulation of mitochondrial fission	2.08795e-05	0.000919767	MAPT/DCN/BNIP3	3
BP	GO:0033561	regulation of water loss via skin	2.30881e-05	0.000991636	ALOX12/TP63/SFN	3
BP	GO:0046825	regulation of protein export from nucleus	2.54453e-05	0.00106622	BAG3/SFN/IFI27	3
CC	GO:0005741	mitochondrial outer membrane	2.54464e-05	0.00239587	VPS13C/ACSL5/PMAIP1/IFI27/BNIP3	5
BP	GO:0000302	response to reactive oxygen species	3.00641e-05	0.00122977	MMP2/MAPT/FYN/CRYAB/BNIP3	5
BP	GO:0097345	mitochondrial outer membrane permeabilization	3.64492e-05	0.0013998	HIP1R/BNIP3/ACAA2	3
BP	GO:1903146	regulation of autophagy of mitochondrion	3.64492e-05	0.0013998	VPS13C/FZD5/BNIP3	3
BP	GO:0032760	positive regulation of tumor necrosis factor production	3.66654e-05	0.0013998	CLU/FZD5/TICAM1/NOD2	4
BP	GO:0034110	regulation of homotypic cell-cell adhesion	3.96166e-05	0.00147959	PLAUR/PRKCA/ALOX12	3
BP	GO:1903557	positive regulation of tumor necrosis factor superfamily cytokine production	4.24553e-05	0.0015231	CLU/FZD5/TICAM1/NOD2	4
BP	GO:0045742	positive regulation of epidermal growth factor receptor signaling pathway	4.29594e-05	0.0015231	PLAUR/HIP1R/GPER1	3
BP	GO:0007173	epidermal growth factor receptor signaling pathway	4.40015e-05	0.0015231	PLAUR/HIP1R/GPER1/IFI6	4
BP	GO:0070997	neuron death	4.43277e-05	0.0015231	MAPT/CLU/CASP7/FYN/TP63/BNIP3	6
CC	GO:0031968	organelle outer membrane	4.66468e-05	0.00239587	VPS13C/ACSL5/PMAIP1/IFI27/BNIP3	5
BP	GO:0097191	extrinsic apoptotic signaling pathway	4.69823e-05	0.00156773	PMAIP1/GPER1/BAG3/IFI27/IFI6	5
BP	GO:0033157	regulation of intracellular protein transport	4.79885e-05	0.00156773	FZD5/FYN/BAG3/SFN/IFI27	5
CC	GO:0019867	outer membrane	4.8565e-05	0.00239587	VPS13C/ACSL5/PMAIP1/IFI27/BNIP3	5
BP	GO:0000266	mitochondrial fission	5.01893e-05	0.00156773	MAPT/DCN/BNIP3	3
BP	GO:1901186	positive regulation of ERBB signaling pathway	5.01893e-05	0.00156773	PLAUR/HIP1R/GPER1	3
BP	GO:1990000	amyloid fibril formation	5.01893e-05	0.00156773	MAPT/CLU/CRYAB	3
BP	GO:1902110	positive regulation of mitochondrial membrane permeability involved in apoptotic process	5.8174e-05	0.00178469	HIP1R/BNIP3/ACAA2	3
BP	GO:0050878	regulation of body fluid levels	6.12012e-05	0.00183113	PLAUR/PRKCA/ATP7B/ALOX12/TP63/SFN	6
BP	GO:0007006	mitochondrial membrane organization	6.18193e-05	0.00183113	HIP1R/PMAIP1/BNIP3/ACAA2	4
BP	GO:1902686	mitochondrial outer membrane permeabilization involved in programmed cell death	6.69482e-05	0.00194944	HIP1R/BNIP3/ACAA2	3
BP	GO:0043280	positive regulation of cysteine-type endopeptidase activity involved in apoptotic process	7.24717e-05	0.00207511	HIP1R/MAPT/PMAIP1/GPER1	4
BP	GO:0038127	ERBB signaling pathway	7.47529e-05	0.00210534	PLAUR/HIP1R/GPER1/IFI6	4
BP	GO:0009615	response to virus	7.96039e-05	0.00219219	CLU/PMAIP1/TICAM1/IFI27/IFI6/BNIP3	6
BP	GO:0043254	regulation of protein-containing complex assembly	8.06828e-05	0.00219219	HIP1R/MAPT/CLU/MMP1/TICAM1/CRYAB	6
BP	GO:0035794	positive regulation of mitochondrial membrane permeability	8.16649e-05	0.00219219	HIP1R/BNIP3/ACAA2	3
BP	GO:0042542	response to hydrogen peroxide	8.4404e-05	0.00223086	MMP2/FYN/CRYAB/BNIP3	4
BP	GO:1902108	regulation of mitochondrial membrane permeability involved in apoptotic process	9.25625e-05	0.00237347	HIP1R/BNIP3/ACAA2	3
BP	GO:2000378	negative regulation of reactive oxygen species metabolic process	9.25625e-05	0.00237347	FYN/CRYAB/BNIP3	3
BP	GO:1903747	regulation of establishment of protein localization to mitochondrion	9.83498e-05	0.00248478	MAPT/FZD5/BAG3	3
BP	GO:0031331	positive regulation of cellular catabolic process	0.000103506	0.00257716	CLU/DCN/TICAM1/NOD2/BAG3/BNIP3	6
BP	GO:1905710	positive regulation of membrane permeability	0.000110622	0.00271499	HIP1R/BNIP3/ACAA2	3
BP	GO:1903829	positive regulation of protein localization	0.00013608	0.00329275	MAPT/FZD5/FYN/GPER1/BAG3/SFN	6
BP	GO:0043331	response to dsRNA	0.000138073	0.00329458	PMAIP1/TICAM1/NOD2	3
BP	GO:0002934	desmosome organization	0.000140038	0.00329568	PRKCA/PERP	2
BP	GO:2000377	regulation of reactive oxygen species metabolic process	0.000143042	0.00332089	MAPT/FYN/CRYAB/BNIP3	4
BP	GO:0034614	cellular response to reactive oxygen species	0.000146775	0.00336212	MMP2/MAPT/FYN/BNIP3	4
BP	GO:0006611	protein export from nucleus	0.000161332	0.00364695	BAG3/SFN/IFI27	3
BP	GO:0051222	positive regulation of protein transport	0.000169096	0.00370981	FZD5/FYN/GPER1/BAG3/SFN	5
BP	GO:0002732	positive regulation of dendritic cell cytokine production	0.000170964	0.00370981	TICAM1/NOD2	2
BP	GO:0071492	cellular response to UV-A	0.000170964	0.00370981	MMP2/MMP1	2
BP	GO:0001666	response to hypoxia	0.000174519	0.00370981	MMP2/PMAIP1/CRYAB/BNIP3/ACAA2	5
BP	GO:0090316	positive regulation of intracellular protein transport	0.00017491	0.00370981	FZD5/FYN/BAG3/SFN	4
BP	GO:0051607	defense response to virus	0.000197554	0.00413901	PMAIP1/TICAM1/IFI27/IFI6/BNIP3	5
BP	GO:0140546	defense response to symbiont	0.00020059	0.00415197	PMAIP1/TICAM1/IFI27/IFI6/BNIP3	5
CC	GO:0014069	postsynaptic density	0.000202054	0.00451869	HIP1R/FYN/GPER1/CRYAB/BNIP3	5
BP	GO:0050891	multicellular organismal water homeostasis	0.0002055	0.00420295	ALOX12/TP63/SFN	3
BP	GO:0036293	response to decreased oxygen levels	0.000213089	0.0043069	MMP2/PMAIP1/CRYAB/BNIP3/ACAA2	5
BP	GO:1904951	positive regulation of establishment of protein localization	0.000216305	0.00432106	FZD5/FYN/GPER1/BAG3/SFN	5
CC	GO:0043197	dendritic spine	0.000219371	0.00451869	HIP1R/MAPT/GPER1/CRYAB	4
CC	GO:0032279	asymmetric synapse	0.000220167	0.00451869	HIP1R/FYN/GPER1/CRYAB/BNIP3	5
CC	GO:0044309	neuron spine	0.000224202	0.00451869	HIP1R/MAPT/GPER1/CRYAB	4
BP	GO:0016236	macroautophagy	0.000239866	0.00472277	VPS13C/DCN/NOD2/BAG3/BNIP3	5
BP	GO:1905907	negative regulation of amyloid fibril formation	0.000241912	0.00472277	CLU/CRYAB	2
BP	GO:0072331	signal transduction by p53 class mediator	0.000253596	0.00489526	PMAIP1/TP63/TP53BP2/PERP	4
BP	GO:0030104	water homeostasis	0.000256842	0.00490282	ALOX12/TP63/SFN	3
BP	GO:0006605	protein targeting	0.000269137	0.00508108	VPS13C/CLU/FZD5/FYN/BAG3	5
CC	GO:0099572	postsynaptic specialization	0.000270885	0.00451869	HIP1R/FYN/GPER1/CRYAB/BNIP3	5
BP	GO:0070141	response to UV-A	0.000281912	0.0052644	MMP2/MMP1	2
CC	GO:0016234	inclusion body	0.000295503	0.00451869	MAPT/CLU/BAG3	3
CC	GO:0098984	neuron to neuron synapse	0.000305317	0.00451869	HIP1R/FYN/GPER1/CRYAB/BNIP3	5
BP	GO:0071214	cellular response to abiotic stimulus	0.000309467	0.00565601	MMP2/MMP1/BAG3/CRYAB/BNIP3	5
BP	GO:0104004	cellular response to environmental stimulus	0.000309467	0.00565601	MMP2/MMP1/BAG3/CRYAB/BNIP3	5
BP	GO:0070482	response to oxygen levels	0.000318057	0.00567981	MMP2/PMAIP1/CRYAB/BNIP3/ACAA2	5
BP	GO:0032640	tumor necrosis factor production	0.000320688	0.00567981	CLU/FZD5/TICAM1/NOD2	4
BP	GO:0032680	regulation of tumor necrosis factor production	0.000320688	0.00567981	CLU/FZD5/TICAM1/NOD2	4
BP	GO:0071706	tumor necrosis factor superfamily cytokine production	0.000355046	0.00610038	CLU/FZD5/TICAM1/NOD2	4
BP	GO:1903555	regulation of tumor necrosis factor superfamily cytokine production	0.000355046	0.00610038	CLU/FZD5/TICAM1/NOD2	4
BP	GO:0006919	activation of cysteine-type endopeptidase activity involved in apoptotic process	0.000355086	0.00610038	HIP1R/MAPT/PMAIP1	3
BP	GO:1903533	regulation of protein targeting	0.000368837	0.00612722	FZD5/FYN/BAG3	3
BP	GO:0002730	regulation of dendritic cell cytokine production	0.000370914	0.00612722	TICAM1/NOD2	2
BP	GO:0061684	chaperone-mediated autophagy	0.000370914	0.00612722	CLU/BAG3	2
BP	GO:1905906	regulation of amyloid fibril formation	0.000370914	0.00612722	CLU/CRYAB	2
BP	GO:0031334	positive regulation of protein-containing complex assembly	0.000376884	0.00616654	HIP1R/MAPT/CLU/MMP1	4
BP	GO:0002720	positive regulation of cytokine production involved in immune response	0.000382926	0.00620629	FZD5/TICAM1/NOD2	3
BP	GO:0002371	dendritic cell cytokine production	0.000419896	0.00674188	TICAM1/NOD2	2
BP	GO:0032388	positive regulation of intracellular transport	0.000431562	0.00686504	FZD5/FYN/BAG3/SFN	4
BP	GO:0061912	selective autophagy	0.000442739	0.00697822	VPS13C/NOD2/BAG3	3
BP	GO:0051899	membrane depolarization	0.000458574	0.00709756	YWHAH/DCN/IFI6	3
BP	GO:0097194	execution phase of apoptosis	0.000458574	0.00709756	CASP7/GPER1/TP53BP2	3
BP	GO:0010639	negative regulation of organelle organization	0.00046413	0.00711087	HIP1R/MAPT/CLU/BNIP3/ACAA2	5
MF	GO:0001540	amyloid-beta binding	0.000467269	0.0609729	CLU/FZD5/CRYAB	3
BP	GO:0046827	positive regulation of protein export from nucleus	0.000471851	0.00711087	BAG3/SFN	2
BP	GO:0051900	regulation of mitochondrial depolarization	0.000471851	0.00711087	DCN/IFI6	2
BP	GO:0010660	regulation of muscle cell apoptotic process	0.000508249	0.00759279	ALOX12/BAG3/BNIP3	3
BP	GO:0009612	response to mechanical stimulus	0.000538154	0.00797025	MMP2/FYN/BAG3/BNIP3	4
BP	GO:0048678	response to axon injury	0.000543208	0.00797634	MMP2/MAP2K1/BNIP3	3
BP	GO:0050821	protein stabilization	0.000567486	0.00823286	HIP1R/CLU/BAG3/CRYAB	4
BP	GO:1901216	positive regulation of neuron death	0.000579673	0.00823286	MAPT/CLU/FYN	3
BP	GO:0035795	negative regulation of mitochondrial membrane permeability	0.000584638	0.00823286	BNIP3/ACAA2	2
BP	GO:0051882	mitochondrial depolarization	0.000584638	0.00823286	DCN/IFI6	2
BP	GO:0055093	response to hyperoxia	0.000584638	0.00823286	MMP2/BNIP3	2
CC	GO:0097038	perinuclear endoplasmic reticulum	0.000584823	0.00786853	CLU/FYN	2
BP	GO:0010657	muscle cell apoptotic process	0.000598478	0.00835923	ALOX12/BAG3/BNIP3	3
BP	GO:0000422	autophagy of mitochondrion	0.000617669	0.00848924	VPS13C/FZD5/BNIP3	3
BP	GO:0061726	mitochondrion disassembly	0.000617669	0.00848924	VPS13C/FZD5/BNIP3	3
BP	GO:0090141	positive regulation of mitochondrial fission	0.000645451	0.00880068	DCN/BNIP3	2
BP	GO:0034109	homotypic cell-cell adhesion	0.000657223	0.00888945	PLAUR/PRKCA/ALOX12	3
BP	GO:0070374	positive regulation of ERK1 and ERK2 cascade	0.000662311	0.00888945	PRKCA/MAP2K1/GPER1/NOD2	4
BP	GO:0010001	glial cell differentiation	0.000707868	0.00942726	MAPT/CLU/MAP2K1/BNIP3	4
BP	GO:1905709	negative regulation of membrane permeability	0.000775864	0.0102334	BNIP3/ACAA2	2
BP	GO:2001234	negative regulation of apoptotic signaling pathway	0.000780312	0.0102334	PLAUR/CLU/IFI6/ACAA2	4
BP	GO:0071219	cellular response to molecule of bacterial origin	0.000792877	0.0103194	PRKCA/FZD5/TICAM1/NOD2	4
BP	GO:0008630	intrinsic apoptotic signaling pathway in response to DNA damage	0.0008083	0.0104411	CLU/TP63/SFN	3
BP	GO:0060907	positive regulation of macrophage cytokine production	0.000845444	0.0108394	TICAM1/NOD2	2
BP	GO:0006875	cellular metal ion homeostasis	0.000864848	0.011006	ACO1/ATP7B/SLC39A8/GPER1/BNIP3	5
MF	GO:0051087	chaperone binding	0.000865523	0.0609729	MAPT/CLU/BAG3	3
BP	GO:0022600	digestive system process	0.000903754	0.0114165	HIP1R/ACO1/NOD2	3
BP	GO:1901028	regulation of mitochondrial outer membrane permeabilization involved in apoptotic signaling pathway	0.000917926	0.0115109	HIP1R/ACAA2	2
BP	GO:0042116	macrophage activation	0.000979849	0.0119335	MAPT/CLU/TICAM1	3
BP	GO:0046822	regulation of nucleocytoplasmic transport	0.000979849	0.0119335	BAG3/SFN/IFI27	3
MF	GO:0140597	protein carrier chaperone	0.000983433	0.0609729	CLU/BAG3	2
BP	GO:0010259	multicellular organism aging	0.0009933	0.0119335	TP63/CRYAB	2
BP	GO:0044346	fibroblast apoptotic process	0.0009933	0.0119335	CASP7/TP63	2
BP	GO:0060561	apoptotic process involved in morphogenesis	0.0009933	0.0119335	FZD5/CRYAB	2
BP	GO:0060740	prostate gland epithelium morphogenesis	0.0009933	0.0119335	MMP2/TP63	2
BP	GO:0006979	response to oxidative stress	0.00100157	0.0119492	MMP2/MAPT/FYN/CRYAB/BNIP3	5
BP	GO:0032102	negative regulation of response to external stimulus	0.00102234	0.012113	PLAUR/FYN/ALOX12/GPER1/NOD2	5
BP	GO:0010951	negative regulation of endopeptidase activity	0.00104434	0.0122889	PLAUR/SFN/IFI6/CRYAB	4
BP	GO:0036296	response to increased oxygen levels	0.00107156	0.0124387	MMP2/BNIP3	2
BP	GO:0045745	positive regulation of G protein-coupled receptor signaling pathway	0.00107156	0.0124387	PRKCA/GPER1	2
BP	GO:0009408	response to heat	0.00111549	0.0128618	MAPT/BAG3/CRYAB	3
BP	GO:0060512	prostate gland morphogenesis	0.00115268	0.0130847	MMP2/TP63	2
BP	GO:1900017	positive regulation of cytokine production involved in inflammatory response	0.00115268	0.0130847	TICAM1/NOD2	2
BP	GO:0072594	establishment of protein localization to organelle	0.00116531	0.0130847	VPS13C/MAPT/CLU/FZD5/BAG3	5
BP	GO:0030518	intracellular steroid hormone receptor signaling pathway	0.0011729	0.0130847	YWHAH/TP63/GPER1	3
BP	GO:0046916	cellular transition metal ion homeostasis	0.0011729	0.0130847	ACO1/ATP7B/SLC39A8	3
BP	GO:0071216	cellular response to biotic stimulus	0.00118908	0.0131796	PRKCA/FZD5/TICAM1/NOD2	4
BP	GO:0010466	negative regulation of peptidase activity	0.00122306	0.0134693	PLAUR/SFN/IFI6/CRYAB	4
BP	GO:0002718	regulation of cytokine production involved in immune response	0.00123215	0.013483	FZD5/TICAM1/NOD2	3
BP	GO:0030522	intracellular receptor signaling pathway	0.0012753	0.0137797	YWHAH/TP63/GPER1/NOD2	4
BP	GO:0051091	positive regulation of DNA-binding transcription factor activity	0.0012753	0.0137797	CLU/TRIM31/TICAM1/NOD2	4
BP	GO:0002367	cytokine production involved in immune response	0.00129325	0.0138863	FZD5/TICAM1/NOD2	3
BP	GO:0090330	regulation of platelet aggregation	0.00132352	0.0140463	PRKCA/ALOX12	2
BP	GO:0032355	response to estradiol	0.00132451	0.0140463	MMP2/GPER1/CRYAB	3
BP	GO:0072655	establishment of protein localization to mitochondrion	0.00138844	0.014634	MAPT/FZD5/BAG3	3
MF	GO:0017124	SH3 domain binding	0.00143183	0.0637193	HIP1R/MAPT/TP53BP2	3
BP	GO:0002862	negative regulation of inflammatory response to antigenic stimulus	0.00150572	0.0156777	FYN/NOD2	2
BP	GO:0060674	placenta blood vessel development	0.00150572	0.0156777	FZD5/MAP2K1	2
BP	GO:0070585	protein localization to mitochondrion	0.00155669	0.0161108	MAPT/FZD5/BAG3	3
BP	GO:0050673	epithelial cell proliferation	0.00158037	0.0162579	PRKCA/MAP2K1/TP63/NOD2/SFN	5
BP	GO:0061081	positive regulation of myeloid leukocyte cytokine production involved in immune response	0.00169921	0.0173277	TICAM1/NOD2	2
BP	GO:0034599	cellular response to oxidative stress	0.0017073	0.0173277	MMP2/MAPT/FYN/BNIP3	4
BP	GO:0022407	regulation of cell-cell adhesion	0.00171461	0.0173277	PLAUR/PRKCA/FYN/ALOX12/NOD2	5
BP	GO:0002702	positive regulation of production of molecular mediator of immune response	0.00173722	0.0174535	FZD5/TICAM1/NOD2	3
BP	GO:0033674	positive regulation of kinase activity	0.00180867	0.0179003	MAPT/CLU/FZD5/MAP2K1/NOD2	5
BP	GO:0043410	positive regulation of MAPK cascade	0.00180867	0.0179003	PRKCA/FZD5/MAP2K1/GPER1/NOD2	5
BP	GO:2001235	positive regulation of apoptotic signaling pathway	0.00181295	0.0179003	PMAIP1/TP63/GPER1	3
BP	GO:0044089	positive regulation of cellular component biogenesis	0.00184085	0.0180254	PRKCA/HIP1R/MAPT/CLU/MMP1	5
BP	GO:0043401	steroid hormone mediated signaling pathway	0.00185157	0.0180254	YWHAH/TP63/GPER1	3
BP	GO:0030003	cellular cation homeostasis	0.0018571	0.0180254	ACO1/ATP7B/SLC39A8/GPER1/BNIP3	5
CC	GO:0097386	glial cell projection	0.00192242	0.0237099	MAPT/FYN	2
BP	GO:0007586	digestion	0.00197053	0.0189127	HIP1R/ACO1/NOD2	3
BP	GO:1903008	organelle disassembly	0.00197053	0.0189127	VPS13C/FZD5/BNIP3	3
BP	GO:0010934	macrophage cytokine production	0.00201045	0.018985	TICAM1/NOD2	2
BP	GO:0010935	regulation of macrophage cytokine production	0.00201045	0.018985	TICAM1/NOD2	2
BP	GO:0002705	positive regulation of leukocyte mediated immunity	0.00201122	0.018985	FZD5/TICAM1/NOD2	3
BP	GO:0043588	skin development	0.00202998	0.0190574	MAP2K1/ALOX12/TP63/SFN	4
BP	GO:0055076	transition metal ion homeostasis	0.00213642	0.0198398	ACO1/ATP7B/SLC39A8	3
BP	GO:0055123	digestive system development	0.00213642	0.0198398	HIP1R/FZD5/TP63	3
MF	GO:0046915	transition metal ion transmembrane transporter activity	0.00220986	0.0637193	ATP7B/SLC39A8	2
BP	GO:0042063	gliogenesis	0.00223222	0.020618	MAPT/CLU/MAP2K1/BNIP3	4
BP	GO:0031333	negative regulation of protein-containing complex assembly	0.00226638	0.0208216	HIP1R/CLU/CRYAB	3
BP	GO:0006882	cellular zinc ion homeostasis	0.00234664	0.0213308	ATP7B/SLC39A8	2
BP	GO:0071392	cellular response to estradiol stimulus	0.00234664	0.0213308	MMP2/GPER1	2
BP	GO:0070372	regulation of ERK1 and ERK2 cascade	0.00236547	0.0213889	PRKCA/MAP2K1/GPER1/NOD2	4
BP	GO:0009411	response to UV	0.00240116	0.0215978	MMP2/MMP1/CASP7	3
BP	GO:1902742	apoptotic process involved in development	0.00246421	0.0220495	FZD5/CRYAB	2
BP	GO:0071456	cellular response to hypoxia	0.00249372	0.0221979	PMAIP1/BNIP3/ACAA2	3
BP	GO:0006623	protein targeting to vacuole	0.00258451	0.0225866	VPS13C/CLU	2
BP	GO:0045429	positive regulation of nitric oxide biosynthetic process	0.00258451	0.0225866	CLU/TICAM1	2
BP	GO:0055069	zinc ion homeostasis	0.00258451	0.0225866	ATP7B/SLC39A8	2
BP	GO:0072503	cellular divalent inorganic cation homeostasis	0.00258997	0.0225866	ATP7B/SLC39A8/GPER1/BNIP3	4
BP	GO:0051092	positive regulation of NF-kappaB transcription factor activity	0.00263666	0.0228633	CLU/TICAM1/NOD2	3
BP	GO:0031647	regulation of protein stability	0.00264831	0.0228633	HIP1R/CLU/BAG3/CRYAB	4
MF	GO:0048156	tau protein binding	0.00268097	0.0637193	CLU/FYN	2
MF	GO:0051879	Hsp90 protein binding	0.00268097	0.0637193	MAPT/NOD2	2
BP	GO:2001236	regulation of extrinsic apoptotic signaling pathway	0.00268542	0.0230677	PMAIP1/GPER1/IFI6	3
BP	GO:0042554	superoxide anion generation	0.00270754	0.023142	MAPT/ALOX12	2
MF	GO:0042277	peptide binding	0.00274061	0.0637193	CLU/FZD5/NOD2/CRYAB	4
BP	GO:0071763	nuclear membrane organization	0.00283328	0.0238607	PRKCA/GPER1	2
BP	GO:1903214	regulation of protein targeting to mitochondrion	0.00283328	0.0238607	FZD5/BAG3	2
BP	GO:1904407	positive regulation of nitric oxide metabolic process	0.00283328	0.0238607	CLU/TICAM1	2
BP	GO:0036294	cellular response to decreased oxygen levels	0.00288601	0.0241082	PMAIP1/BNIP3/ACAA2	3
BP	GO:0060249	anatomical structure homeostasis	0.00289074	0.0241082	PRKCA/SLC39A8/NOD2/BAG3	4
BP	GO:0003254	regulation of membrane depolarization	0.00296173	0.0244627	DCN/IFI6	2
BP	GO:0030574	collagen catabolic process	0.00296173	0.0244627	MMP2/MMP1	2
BP	GO:0051604	protein maturation	0.00298546	0.0245408	PLAUR/ATP7B/CASP7/PERP	4
BP	GO:0010837	regulation of keratinocyte proliferation	0.00309287	0.0253026	TP63/SFN	2
BP	GO:0070371	ERK1 and ERK2 cascade	0.00311504	0.0253632	PRKCA/MAP2K1/GPER1/NOD2	4
BP	GO:0051168	nuclear export	0.00320386	0.0257836	BAG3/SFN/IFI27	3
BP	GO:0001774	microglial cell activation	0.0032267	0.0257836	MAPT/CLU	2
BP	GO:0002861	regulation of inflammatory response to antigenic stimulus	0.0032267	0.0257836	FYN/NOD2	2
BP	GO:0060711	labyrinthine layer development	0.0032267	0.0257836	FZD5/MAP2K1	2
BP	GO:0062197	cellular response to chemical stress	0.00328238	0.0261071	MMP2/MAPT/FYN/BNIP3	4
BP	GO:0045747	positive regulation of Notch signaling pathway	0.00336321	0.0266267	TP63/NOD2	2
CC	GO:0031256	leading edge membrane	0.00339521	0.0386531	HIP1R/MAPT/GPER1	3
BP	GO:0007568	aging	0.00342726	0.026886	MMP2/TP63/CRYAB	3
BP	GO:1902904	negative regulation of supramolecular fiber organization	0.00342726	0.026886	HIP1R/CLU/CRYAB	3
BP	GO:0030216	keratinocyte differentiation	0.00348456	0.0271041	MAP2K1/TP63/SFN	3
BP	GO:0035987	endodermal cell differentiation	0.00350239	0.0271041	MMP2/MAP2K1	2
BP	GO:0043330	response to exogenous dsRNA	0.00350239	0.0271041	TICAM1/NOD2	2
BP	GO:0045861	negative regulation of proteolysis	0.00352687	0.0271711	PLAUR/SFN/IFI6/CRYAB	4
BP	GO:1903034	regulation of response to wounding	0.00360094	0.0272208	PLAUR/MAP2K1/ALOX12	3
BP	GO:2001242	regulation of intrinsic apoptotic signaling pathway	0.00360094	0.0272208	PLAUR/CLU/PMAIP1	3
BP	GO:0002269	leukocyte activation involved in inflammatory response	0.00364422	0.0272208	MAPT/CLU	2
BP	GO:0030195	negative regulation of blood coagulation	0.00364422	0.0272208	PLAUR/ALOX12	2
BP	GO:0061082	myeloid leukocyte cytokine production	0.00364422	0.0272208	TICAM1/NOD2	2
BP	GO:1901570	fatty acid derivative biosynthetic process	0.00364422	0.0272208	ACSL5/ALOX12	2
BP	GO:2001238	positive regulation of extrinsic apoptotic signaling pathway	0.00364422	0.0272208	PMAIP1/GPER1	2
BP	GO:0072507	divalent inorganic cation homeostasis	0.00367202	0.0273096	ATP7B/SLC39A8/GPER1/BNIP3	4
BP	GO:0071453	cellular response to oxygen levels	0.00377993	0.0276979	PMAIP1/BNIP3/ACAA2	3
BP	GO:0030850	prostate gland development	0.00378871	0.0276979	MMP2/TP63	2
BP	GO:0060324	face development	0.00378871	0.0276979	MMP2/MAP2K1	2
BP	GO:1900047	negative regulation of hemostasis	0.00378871	0.0276979	PLAUR/ALOX12	2
BP	GO:0002237	response to molecule of bacterial origin	0.0038212	0.0276996	PRKCA/FZD5/TICAM1/NOD2	4
BP	GO:0010038	response to metal ion	0.0038212	0.0276996	MAPT/ACO1/ATP7B/BNIP3	4
BP	GO:0051099	positive regulation of binding	0.00390223	0.0281682	PLAUR/HIP1R/TICAM1	3
BP	GO:0010543	regulation of platelet activation	0.00393583	0.028174	PRKCA/ALOX12	2
BP	GO:0048013	ephrin receptor signaling pathway	0.00393583	0.028174	MMP2/FYN	2
BP	GO:0010656	negative regulation of muscle cell apoptotic process	0.00408559	0.0290043	ALOX12/BAG3	2
BP	GO:0010662	regulation of striated muscle cell apoptotic process	0.00408559	0.0290043	BAG3/BNIP3	2
BP	GO:0050819	negative regulation of coagulation	0.00423796	0.0298394	PLAUR/ALOX12	2
BP	GO:0061900	glial cell activation	0.00423796	0.0298394	MAPT/CLU	2
BP	GO:0007219	Notch signaling pathway	0.00428358	0.0300375	TP63/NOD2/PERP	3
BP	GO:0051346	negative regulation of hydrolase activity	0.00433449	0.0301883	PLAUR/SFN/IFI6/CRYAB	4
BP	GO:0050728	negative regulation of inflammatory response	0.00434926	0.0301883	FYN/GPER1/NOD2	3
BP	GO:0031103	axon regeneration	0.00439295	0.0301883	MMP2/MAP2K1	2
BP	GO:0043616	keratinocyte proliferation	0.00439295	0.0301883	TP63/SFN	2
BP	GO:1904645	response to amyloid-beta	0.00439295	0.0301883	MMP2/FYN	2
BP	GO:0009266	response to temperature stimulus	0.00448246	0.0306808	MAPT/BAG3/CRYAB	3
BP	GO:0050767	regulation of neurogenesis	0.00450139	0.030688	MAPT/MAP2K1/YWHAH/GPER1	4
BP	GO:0002700	regulation of production of molecular mediator of immune response	0.00454999	0.0307788	FZD5/TICAM1/NOD2	3
BP	GO:0010676	positive regulation of cellular carbohydrate metabolic process	0.00455053	0.0307788	PMAIP1/GPER1	2
BP	GO:0002833	positive regulation of response to biotic stimulus	0.00461813	0.0311135	PRKCA/FYN/NOD2	3
BP	GO:0043123	positive regulation of I-kappaB kinase/NF-kappaB signaling	0.00468689	0.031331	FYN/TICAM1/NOD2	3
BP	GO:0071478	cellular response to radiation	0.00468689	0.031331	MMP2/MMP1/CRYAB	3
BP	GO:0010658	striated muscle cell apoptotic process	0.00471071	0.0313682	BAG3/BNIP3	2
CC	GO:0032589	neuron projection membrane	0.00472768	0.0499784	MAPT/GPER1	2
BP	GO:1902903	regulation of supramolecular fiber organization	0.00480385	0.0318649	HIP1R/MAPT/CLU/CRYAB	4
BP	GO:0001706	endoderm formation	0.00487348	0.0322024	MMP2/MAP2K1	2
BP	GO:0009755	hormone-mediated signaling pathway	0.0048969	0.0322332	YWHAH/TP63/GPER1	3
BP	GO:0045604	regulation of epidermal cell differentiation	0.00503882	0.0329152	TP63/SFN	2
BP	GO:0072666	establishment of protein localization to vacuole	0.00503882	0.0329152	VPS13C/CLU	2
BP	GO:0006998	nuclear envelope organization	0.00520672	0.0338831	PRKCA/GPER1	2
BP	GO:0071900	regulation of protein serine/threonine kinase activity	0.00530645	0.0344018	FZD5/MAP2K1/NOD2/SFN	4
BP	GO:0022617	extracellular matrix disassembly	0.00555019	0.0353156	MMP2/MMP1	2
BP	GO:0031102	neuron projection regeneration	0.00555019	0.0353156	MMP2/MAP2K1	2
BP	GO:0032387	negative regulation of intracellular transport	0.00555019	0.0353156	BAG3/CRYAB	2
BP	GO:0045428	regulation of nitric oxide biosynthetic process	0.00555019	0.0353156	CLU/TICAM1	2
BP	GO:0046824	positive regulation of nucleocytoplasmic transport	0.00555019	0.0353156	BAG3/SFN	2
BP	GO:0098739	import across plasma membrane	0.00563779	0.0357407	ACSL5/FYN/SLC39A8	3
BP	GO:0031663	lipopolysaccharide-mediated signaling pathway	0.00572573	0.0360322	PRKCA/TICAM1	2
BP	GO:0032731	positive regulation of interleukin-1 beta production	0.00572573	0.0360322	FZD5/NOD2	2
CC	GO:0030017	sarcomere	0.00576505	0.0568818	MMP2/BAG3/CRYAB	3
MF	GO:0033218	amide binding	0.00582718	0.107008	CLU/FZD5/NOD2/CRYAB	4
BP	GO:0080164	regulation of nitric oxide metabolic process	0.00608439	0.0381496	CLU/TICAM1	2
BP	GO:0045216	cell-cell junction organization	0.00611298	0.0381895	PRKCA/FZD5/PERP	3
BP	GO:0071383	cellular response to steroid hormone stimulus	0.00619445	0.0383741	YWHAH/TP63/GPER1	3
MF	GO:0097110	scaffold protein binding	0.00620702	0.107008	MAP2K1/FYN	2
BP	GO:0050678	regulation of epithelial cell proliferation	0.00625595	0.0383741	PRKCA/TP63/NOD2/SFN	4
BP	GO:0006879	cellular iron ion homeostasis	0.00626749	0.0383741	ACO1/SLC39A8	2
BP	GO:0034605	cellular response to heat	0.00626749	0.0383741	MAPT/BAG3	2
BP	GO:0045682	regulation of epidermis development	0.00626749	0.0383741	TP63/SFN	2
BP	GO:0031396	regulation of protein ubiquitination	0.00627656	0.0383741	FYN/TICAM1/NOD2	3
MF	GO:0002039	p53 binding	0.00639088	0.107008	TP63/TP53BP2	2
BP	GO:0031638	zymogen activation	0.0064531	0.0393135	PLAUR/PERP	2
BP	GO:0002064	epithelial cell development	0.00652682	0.0396222	FZD5/TP63/SFN	3
BP	GO:0045860	positive regulation of protein kinase activity	0.0065779	0.0397916	CLU/FZD5/MAP2K1/NOD2	4
BP	GO:0038034	signal transduction in absence of ligand	0.00664119	0.0398936	BAG3/IFI6	2
BP	GO:0097192	extrinsic apoptotic signaling pathway in absence of ligand	0.00664119	0.0398936	BAG3/IFI6	2
BP	GO:0048645	animal organ formation	0.00683177	0.0408954	MAP2K1/TP63	2
CC	GO:0016323	basolateral plasma membrane	0.00694881	0.0629678	ATP7B/SLC39A8/NOD2	3
BP	GO:0030193	regulation of blood coagulation	0.00702482	0.04176	PLAUR/ALOX12	2
BP	GO:0032722	positive regulation of chemokine production	0.00702482	0.04176	TICAM1/NOD2	2
BP	GO:0070527	platelet aggregation	0.00722034	0.0427743	PRKCA/ALOX12	2
CC	GO:0030016	myofibril	0.0072871	0.0629678	MMP2/BAG3/CRYAB	3
BP	GO:0071222	cellular response to lipopolysaccharide	0.00731316	0.0431753	PRKCA/TICAM1/NOD2	3
BP	GO:0006457	protein folding	0.00740386	0.0434971	CLU/BAG3/CRYAB	3
BP	GO:1900046	regulation of hemostasis	0.00741831	0.0434971	PLAUR/ALOX12	2
BP	GO:0050679	positive regulation of epithelial cell proliferation	0.00749522	0.0437986	PRKCA/TP63/NOD2	3
MF	GO:0003779	actin binding	0.00752067	0.107008	HIP1R/MAPT/YWHAH/NOD2	4
BP	GO:0007596	blood coagulation	0.00758725	0.0439227	PLAUR/PRKCA/ALOX12	3
BP	GO:0002067	glandular epithelial cell differentiation	0.00761873	0.0439227	FZD5/TP63	2
BP	GO:0071260	cellular response to mechanical stimulus	0.00761873	0.0439227	BAG3/BNIP3	2
BP	GO:0150076	neuroinflammatory response	0.00761873	0.0439227	MAPT/CLU	2
BP	GO:0051651	maintenance of location in cell	0.00767996	0.0441276	VPS13C/ATP7B/GPER1	3
BP	GO:0048732	gland development	0.0077915	0.044495	MMP2/MAP2K1/ATP7B/TP63	4
BP	GO:0006801	superoxide metabolic process	0.00782159	0.044495	MAPT/ALOX12	2
BP	GO:0032732	positive regulation of interleukin-1 production	0.00782159	0.044495	FZD5/NOD2	2
BP	GO:0071902	positive regulation of protein serine/threonine kinase activity	0.00796211	0.0451449	FZD5/MAP2K1/NOD2	3
BP	GO:0050818	regulation of coagulation	0.00802687	0.0453624	PLAUR/ALOX12	2
BP	GO:0050817	coagulation	0.00805751	0.0453862	PLAUR/PRKCA/ALOX12	3
CC	GO:0032432	actin filament bundle	0.00806418	0.0629678	BAG3/CRYAB	2
CC	GO:0043292	contractile fiber	0.0080837	0.0629678	MMP2/BAG3/CRYAB	3
BP	GO:0010975	regulation of neuron projection development	0.00810085	0.0454801	MAPT/MAP2K1/YWHAH/FYN	4
BP	GO:0007599	hemostasis	0.00815358	0.0454801	PLAUR/PRKCA/ALOX12	3
BP	GO:0050769	positive regulation of neurogenesis	0.00815358	0.0454801	MAPT/MAP2K1/GPER1	3
BP	GO:0050804	modulation of chemical synaptic transmission	0.00822683	0.0456355	MAPT/YWHAH/FYN/GPER1	4
BP	GO:0006809	nitric oxide biosynthetic process	0.00823458	0.0456355	CLU/TICAM1	2
BP	GO:0099177	regulation of trans-synaptic signaling	0.00829031	0.0457966	MAPT/YWHAH/FYN/GPER1	4
BP	GO:0002534	cytokine production involved in inflammatory response	0.0084447	0.0463337	TICAM1/NOD2	2
BP	GO:1900015	regulation of cytokine production involved in inflammatory response	0.0084447	0.0463337	TICAM1/NOD2	2
BP	GO:0009314	response to radiation	0.00848267	0.0463337	MMP2/MMP1/CASP7/CRYAB	4
BP	GO:0009913	epidermal cell differentiation	0.00854469	0.0463337	MAP2K1/TP63/SFN	3
BP	GO:0051090	regulation of DNA-binding transcription factor activity	0.00861254	0.0463337	CLU/TRIM31/TICAM1/NOD2	4
BP	GO:0045913	positive regulation of carbohydrate metabolic process	0.00865723	0.0463337	PMAIP1/GPER1	2
BP	GO:0050772	positive regulation of axonogenesis	0.00865723	0.0463337	MAPT/MAP2K1	2
BP	GO:0061045	negative regulation of wound healing	0.00865723	0.0463337	PLAUR/ALOX12	2
BP	GO:0072665	protein localization to vacuole	0.00865723	0.0463337	VPS13C/CLU	2
BP	GO:1901568	fatty acid derivative metabolic process	0.00865723	0.0463337	ACSL5/ALOX12	2
BP	GO:0051960	regulation of nervous system development	0.00874371	0.0465101	MAPT/MAP2K1/YWHAH/GPER1	4
BP	GO:0002274	myeloid leukocyte activation	0.00874433	0.0465101	MAPT/CLU/TICAM1	3
BP	GO:0002437	inflammatory response to antigenic stimulus	0.00887214	0.0470443	FYN/NOD2	2
BP	GO:0051403	stress-activated MAPK cascade	0.00894671	0.0472937	MAP2K1/NOD2/CRYAB	3
BP	GO:0014068	positive regulation of phosphatidylinositol 3-kinase signaling	0.00908944	0.0477543	DCN/GPER1	2
BP	GO:0071230	cellular response to amino acid stimulus	0.00908944	0.0477543	MMP2/FYN	2
BP	GO:0002703	regulation of leukocyte mediated immunity	0.00915184	0.0479356	FZD5/TICAM1/NOD2	3
BP	GO:0002443	leukocyte mediated immunity	0.00921318	0.0481101	CLU/FZD5/TICAM1/NOD2	4
CC	GO:0009925	basal plasma membrane	0.00922319	0.0682516	ATP7B/SLC39A8/NOD2	3
BP	GO:0046209	nitric oxide metabolic process	0.00953117	0.0493209	CLU/TICAM1	2
BP	GO:0048708	astrocyte differentiation	0.00953117	0.0493209	MAPT/MAP2K1	2
BP	GO:1905897	regulation of response to endoplasmic reticulum stress	0.00953117	0.0493209	CLU/PMAIP1	2
BP	GO:1901617	organic hydroxy compound biosynthetic process	0.00957037	0.0493751	ALOX12/GPER1/ACAA2	3
MF	GO:0140104	molecular carrier activity	0.00966262	0.107008	CLU/BAG3	2
BP	GO:0031098	stress-activated protein kinase signaling cascade	0.00967673	0.0497743	MAP2K1/NOD2/CRYAB	3
BP	GO:0007492	endoderm development	0.00975558	0.0498812	MMP2/MAP2K1	2
BP	GO:2001057	reactive nitrogen species metabolic process	0.00975558	0.0498812	CLU/TICAM1	2
CC	GO:0043025	neuronal cell body	0.00990426	0.0696978	HIP1R/MAPT/FZD5/CRYAB	4
BP	GO:0016485	protein processing	0.0101091	0.0515356	PLAUR/CASP7/PERP	3
BP	GO:0008625	extrinsic apoptotic signaling pathway via death domain receptors	0.0102114	0.0519031	PMAIP1/BAG3	2
BP	GO:0098657	import into cell	0.0103295	0.0521944	ACSL5/FYN/SLC39A8	3
BP	GO:1903320	regulation of protein modification by small protein conjugation or removal	0.0103295	0.0521944	FYN/TICAM1/NOD2	3
CC	GO:0120111	neuron projection cytoplasm	0.0103605	0.0696978	HIP1R/MAPT	2
BP	GO:0032092	positive regulation of protein binding	0.0104429	0.0526124	HIP1R/TICAM1	2
BP	GO:0043122	regulation of I-kappaB kinase/NF-kappaB signaling	0.0106653	0.0531665	FYN/TICAM1/NOD2	3
BP	GO:0051402	neuron apoptotic process	0.0106653	0.0531665	CASP7/TP63/BNIP3	3
BP	GO:0001892	embryonic placenta development	0.0106766	0.0531665	FZD5/MAP2K1	2
BP	GO:1900182	positive regulation of protein localization to nucleus	0.0106766	0.0531665	FYN/BAG3	2
BP	GO:0045785	positive regulation of cell adhesion	0.0107202	0.0532291	PLAUR/PRKCA/FYN/NOD2	4
BP	GO:0001819	positive regulation of cytokine production	0.0108716	0.0538252	CLU/FZD5/TICAM1/NOD2	4
BP	GO:0055072	iron ion homeostasis	0.0109127	0.0538736	ACO1/SLC39A8	2
CC	GO:0045178	basal part of cell	0.0111013	0.0714346	ATP7B/SLC39A8/NOD2	3
BP	GO:0002709	regulation of T cell mediated immunity	0.0111511	0.0545587	FZD5/NOD2	2
BP	GO:0034644	cellular response to UV	0.0111511	0.0545587	MMP2/MMP1	2
BP	GO:0071229	cellular response to acid chemical	0.0111511	0.0545587	MMP2/FYN	2
BP	GO:0061564	axon development	0.0111785	0.0545587	MMP2/MAPT/MAP2K1/FYN	4
BP	GO:0002699	positive regulation of immune effector process	0.0113559	0.0552676	FZD5/TICAM1/NOD2	3
BP	GO:0042475	odontogenesis of dentin-containing tooth	0.0116347	0.0564645	TP63/PERP	2
BP	GO:0009791	post-embryonic development	0.01188	0.0573308	FZD5/ACO1	2
BP	GO:0072091	regulation of stem cell proliferation	0.01188	0.0573308	TP63/SFN	2
BP	GO:0070301	cellular response to hydrogen peroxide	0.0121275	0.0581984	FYN/BNIP3	2
BP	GO:1904705	regulation of vascular associated smooth muscle cell proliferation	0.0121275	0.0581984	MMP2/GPER1	2
BP	GO:1903035	negative regulation of response to wounding	0.0123773	0.0592316	PLAUR/ALOX12	2
BP	GO:1990874	vascular associated smooth muscle cell proliferation	0.0126293	0.0602699	MMP2/GPER1	2
BP	GO:0031348	negative regulation of defense response	0.0126882	0.060383	FYN/GPER1/NOD2	3
CC	GO:0005770	late endosome	0.0129441	0.0798219	VPS13C/MAP2K1/ATP7B	3
BP	GO:0001894	tissue homeostasis	0.0130665	0.0620116	PRKCA/SLC39A8/NOD2	3
BP	GO:0008593	regulation of Notch signaling pathway	0.0131401	0.0621894	TP63/NOD2	2
BP	GO:0032642	regulation of chemokine production	0.0133989	0.0632399	TICAM1/NOD2	2
BP	GO:0051962	positive regulation of nervous system development	0.0135809	0.0639234	MAPT/MAP2K1/GPER1	3
BP	GO:0032602	chemokine production	0.0136599	0.0639447	TICAM1/NOD2	2
BP	GO:0032755	positive regulation of interleukin-6 production	0.0136599	0.0639447	TICAM1/NOD2	2
BP	GO:0002532	production of molecular mediator involved in inflammatory response	0.0139231	0.0648235	TICAM1/NOD2	2
BP	GO:0048709	oligodendrocyte differentiation	0.0139231	0.0648235	CLU/BNIP3	2
BP	GO:1905477	positive regulation of protein localization to membrane	0.0141885	0.0657031	FYN/GPER1	2
BP	GO:2001243	negative regulation of intrinsic apoptotic signaling pathway	0.0141885	0.0657031	PLAUR/CLU	2
BP	GO:0006874	cellular calcium ion homeostasis	0.0142402	0.065765	ATP7B/GPER1/BNIP3	3
BP	GO:0007249	I-kappaB kinase/NF-kappaB signaling	0.0147805	0.0680777	FYN/TICAM1/NOD2	3
BP	GO:0000041	transition metal ion transport	0.0149979	0.0687102	ATP7B/SLC39A8	2
BP	GO:0006626	protein targeting to mitochondrion	0.0149979	0.0687102	FZD5/BAG3	2
BP	GO:0032963	collagen metabolic process	0.0158268	0.072315	MMP2/MMP1	2
BP	GO:0090398	cellular senescence	0.0161074	0.073402	MAP2K1/TP63	2
MF	GO:1902936	phosphatidylinositol bisphosphate binding	0.016237	0.107008	HIP1R/MAPT	2
CC	GO:0019898	extrinsic component of membrane	0.0165692	0.0980895	PLAUR/VPS13C/FYN	3
BP	GO:0019395	fatty acid oxidation	0.0166751	0.0757018	ALOX12/ACAA2	2
BP	GO:0001676	long-chain fatty acid metabolic process	0.0169621	0.0757018	ACSL5/ALOX12	2
BP	GO:0014066	regulation of phosphatidylinositol 3-kinase signaling	0.0169621	0.0757018	DCN/GPER1	2
BP	GO:0032611	interleukin-1 beta production	0.0169621	0.0757018	FZD5/NOD2	2
BP	GO:0032651	regulation of interleukin-1 beta production	0.0169621	0.0757018	FZD5/NOD2	2
MF	GO:0004222	metalloendopeptidase activity	0.0170903	0.107008	MMP2/MMP1	2
BP	GO:0048259	regulation of receptor-mediated endocytosis	0.0172512	0.0757018	HIP1R/CLU	2
BP	GO:0010720	positive regulation of cell development	0.017506	0.0757018	MAPT/MAP2K1/GPER1	3
BP	GO:0002456	T cell mediated immunity	0.0175424	0.0757018	FZD5/NOD2	2
MF	GO:0005381	iron ion transmembrane transporter activity	0.0177644	0.107008	SLC39A8	1
MF	GO:0005384	manganese ion transmembrane transporter activity	0.0177644	0.107008	SLC39A8	1
MF	GO:0016801	hydrolase activity, acting on ether bonds	0.0177644	0.107008	ALOX12	1
BP	GO:0055074	calcium ion homeostasis	0.0178083	0.0757018	ATP7B/GPER1/BNIP3	3
BP	GO:0002824	positive regulation of adaptive immune response based on somatic recombination of immune receptors built from immunoglobulin superfamily domains	0.0178358	0.0757018	FZD5/NOD2	2
BP	GO:0001542	ovulation from ovarian follicle	0.0178459	0.0757018	MMP2	1
BP	GO:0002775	antimicrobial peptide production	0.0178459	0.0757018	NOD2	1
BP	GO:0014012	peripheral nervous system axon regeneration	0.0178459	0.0757018	MMP2	1
BP	GO:0015911	long-chain fatty acid import across plasma membrane	0.0178459	0.0757018	ACSL5	1
BP	GO:0031666	positive regulation of lipopolysaccharide-mediated signaling pathway	0.0178459	0.0757018	PRKCA	1
BP	GO:0032025	response to cobalt ion	0.0178459	0.0757018	BNIP3	1
BP	GO:0043653	mitochondrial fragmentation involved in apoptotic process	0.0178459	0.0757018	BNIP3	1
BP	GO:0060346	bone trabecula formation	0.0178459	0.0757018	MMP2	1
BP	GO:0060502	epithelial cell proliferation involved in lung morphogenesis	0.0178459	0.0757018	MAP2K1	1
BP	GO:0060525	prostate glandular acinus development	0.0178459	0.0757018	TP63	1
BP	GO:0060947	cardiac vascular smooth muscle cell differentiation	0.0178459	0.0757018	GPER1	1
BP	GO:0070472	regulation of uterine smooth muscle contraction	0.0178459	0.0757018	GPER1	1
BP	GO:0071421	manganese ion transmembrane transport	0.0178459	0.0757018	SLC39A8	1
BP	GO:0097201	negative regulation of transcription from RNA polymerase II promoter in response to stress	0.0178459	0.0757018	BAG3	1
BP	GO:0098779	positive regulation of mitophagy in response to mitochondrial depolarization	0.0178459	0.0757018	VPS13C	1
BP	GO:1902237	positive regulation of endoplasmic reticulum stress-induced intrinsic apoptotic signaling pathway	0.0178459	0.0757018	PMAIP1	1
BP	GO:1904181	positive regulation of membrane depolarization	0.0178459	0.0757018	DCN	1
BP	GO:2000271	positive regulation of fibroblast apoptotic process	0.0178459	0.0757018	TP63	1
BP	GO:2001020	regulation of response to DNA damage stimulus	0.0182671	0.077029	MAPT/CLU/PMAIP1	3
BP	GO:0002065	columnar/cuboidal epithelial cell differentiation	0.0184287	0.077029	FZD5/TP63	2
BP	GO:0034440	lipid oxidation	0.0184287	0.077029	ALOX12/ACAA2	2
CC	GO:1905370	serine-type endopeptidase complex	0.0186677	0.104306	PLAUR	1
BP	GO:0021782	glial cell development	0.0187283	0.077029	MAPT/CLU	2
BP	GO:0043406	positive regulation of MAP kinase activity	0.0187283	0.077029	FZD5/NOD2	2
BP	GO:0043200	response to amino acid	0.01903	0.077029	MMP2/FYN	2
BP	GO:0030198	extracellular matrix organization	0.0192045	0.077029	MMP2/MMP1/SLC39A8	3
BP	GO:0002455	humoral immune response mediated by circulating immunoglobulin	0.0193337	0.077029	CLU/NOD2	2
BP	GO:0002708	positive regulation of lymphocyte mediated immunity	0.0193337	0.077029	FZD5/NOD2	2
BP	GO:0031398	positive regulation of protein ubiquitination	0.0193337	0.077029	TICAM1/NOD2	2
BP	GO:0032609	interferon-gamma production	0.0193337	0.077029	FZD5/NOD2	2
BP	GO:0032649	regulation of interferon-gamma production	0.0193337	0.077029	FZD5/NOD2	2
BP	GO:0043062	extracellular structure organization	0.0193634	0.077029	MMP2/MMP1/SLC39A8	3
MF	GO:0000774	adenyl-nucleotide exchange factor activity	0.0195239	0.107008	BAG3	1
MF	GO:0005078	MAP-kinase scaffold activity	0.0195239	0.107008	MAP2K1	1
MF	GO:0035256	G protein-coupled glutamate receptor binding	0.0195239	0.107008	FYN	1
MF	GO:0047676	arachidonate-CoA ligase activity	0.0195239	0.107008	ACSL5	1
MF	GO:0097371	MDM2/MDM4 family protein binding	0.0195239	0.107008	TP63	1
BP	GO:0002069	columnar/cuboidal epithelial cell maturation	0.0196134	0.077029	FZD5	1
BP	GO:0002604	regulation of dendritic cell antigen processing and presentation	0.0196134	0.077029	NOD2	1
BP	GO:0002759	regulation of antimicrobial humoral response	0.0196134	0.077029	NOD2	1
BP	GO:0019372	lipoxygenase pathway	0.0196134	0.077029	ALOX12	1
BP	GO:0033212	iron import into cell	0.0196134	0.077029	SLC39A8	1
BP	GO:0034350	regulation of glial cell apoptotic process	0.0196134	0.077029	PRKCA	1
BP	GO:0035112	genitalia morphogenesis	0.0196134	0.077029	TP63	1
BP	GO:0046643	regulation of gamma-delta T cell activation	0.0196134	0.077029	NOD2	1
BP	GO:0051081	nuclear membrane disassembly	0.0196134	0.077029	PRKCA	1
BP	GO:0051561	positive regulation of mitochondrial calcium ion concentration	0.0196134	0.077029	BNIP3	1
BP	GO:0060020	Bergmann glial cell differentiation	0.0196134	0.077029	MAP2K1	1
BP	GO:0060439	trachea morphogenesis	0.0196134	0.077029	MAP2K1	1
BP	GO:0060453	regulation of gastric acid secretion	0.0196134	0.077029	HIP1R	1
BP	GO:0060601	lateral sprouting from an epithelium	0.0196134	0.077029	TP63	1
BP	GO:0060742	epithelial cell differentiation involved in prostate gland development	0.0196134	0.077029	TP63	1
BP	GO:0070471	uterine smooth muscle contraction	0.0196134	0.077029	GPER1	1
BP	GO:1904672	regulation of somatic stem cell population maintenance	0.0196134	0.077029	TP63	1
BP	GO:2000109	regulation of macrophage apoptotic process	0.0196134	0.077029	NOD2	1
BP	GO:0002821	positive regulation of adaptive immune response	0.0196395	0.077029	FZD5/NOD2	2
BP	GO:0009416	response to light stimulus	0.0196832	0.077029	MMP2/MMP1/CASP7	3
BP	GO:0045229	external encapsulating structure organization	0.0196832	0.077029	MMP2/MMP1/SLC39A8	3
BP	GO:0022409	positive regulation of cell-cell adhesion	0.0198442	0.0774827	PLAUR/FYN/NOD2	3
BP	GO:1901214	regulation of neuron death	0.0203317	0.0788134	MAPT/CLU/FYN	3
BP	GO:0002224	toll-like receptor signaling pathway	0.020569	0.0788134	TICAM1/NOD2	2
BP	GO:0022612	gland morphogenesis	0.020569	0.0788134	MMP2/TP63	2
BP	GO:0071482	cellular response to light stimulus	0.020569	0.0788134	MMP2/MMP1	2
MF	GO:0031072	heat shock protein binding	0.0206899	0.107008	MAPT/NOD2	2
MF	GO:0051082	unfolded protein binding	0.0206899	0.107008	CLU/CRYAB	2
CC	GO:0031253	cell projection membrane	0.0207116	0.104306	HIP1R/MAPT/GPER1	3
CC	GO:0030018	Z disc	0.0207881	0.104306	BAG3/CRYAB	2
BP	GO:0071496	cellular response to external stimulus	0.0208258	0.0788134	PMAIP1/BAG3/BNIP3	3
BP	GO:0031109	microtubule polymerization or depolymerization	0.0208829	0.0788134	MAPT/CRYAB	2
BP	GO:0046660	female sex differentiation	0.0208829	0.0788134	MMP2/TP63	2
BP	GO:0072089	stem cell proliferation	0.0208829	0.0788134	TP63/SFN	2
BP	GO:0006913	nucleocytoplasmic transport	0.020992	0.0788134	BAG3/SFN/IFI27	3
BP	GO:0051169	nuclear transport	0.020992	0.0788134	BAG3/SFN/IFI27	3
MF	GO:0034452	dynactin binding	0.0212804	0.107008	MAPT	1
BP	GO:0001553	luteinization	0.0213778	0.0788134	MMP2	1
BP	GO:0010635	regulation of mitochondrial fusion	0.0213778	0.0788134	BNIP3	1
BP	GO:0010936	negative regulation of macrophage cytokine production	0.0213778	0.0788134	NOD2	1
BP	GO:0030397	membrane disassembly	0.0213778	0.0788134	PRKCA	1
BP	GO:0032490	detection of molecule of bacterial origin	0.0213778	0.0788134	NOD2	1
BP	GO:0032957	inositol trisphosphate metabolic process	0.0213778	0.0788134	GPER1	1
BP	GO:0034135	regulation of toll-like receptor 2 signaling pathway	0.0213778	0.0788134	NOD2	1
BP	GO:0043589	skin morphogenesis	0.0213778	0.0788134	TP63	1
BP	GO:0061517	macrophage proliferation	0.0213778	0.0788134	CLU	1
BP	GO:0090331	negative regulation of platelet aggregation	0.0213778	0.0788134	ALOX12	1
BP	GO:0140052	cellular response to oxidised low-density lipoprotein particle stimulus	0.0213778	0.0788134	TICAM1	1
BP	GO:1901030	positive regulation of mitochondrial outer membrane permeabilization involved in apoptotic signaling pathway	0.0213778	0.0788134	HIP1R	1
BP	GO:1902065	response to L-glutamate	0.0213778	0.0788134	FYN	1
BP	GO:1902950	regulation of dendritic spine maintenance	0.0213778	0.0788134	FYN	1
BP	GO:1903800	positive regulation of miRNA maturation	0.0213778	0.0788134	MAP2K1	1
BP	GO:1903867	extraembryonic membrane development	0.0213778	0.0788134	FZD5	1
CC	GO:0030665	clathrin-coated vesicle membrane	0.0213898	0.104306	HIP1R/FZD5	2
BP	GO:0098659	inorganic cation import across plasma membrane	0.0215167	0.0789867	FYN/SLC39A8	2
BP	GO:0099587	inorganic ion import across plasma membrane	0.0215167	0.0789867	FYN/SLC39A8	2
BP	GO:0002440	production of molecular mediator of immune response	0.0216641	0.079358	FZD5/TICAM1/NOD2	3
BP	GO:0001704	formation of primary germ layer	0.0218367	0.0798199	MMP2/MAP2K1	2
MF	GO:0044325	transmembrane transporter binding	0.0219544	0.107008	YWHAH/FYN	2
CC	GO:0042583	chromaffin granule	0.0220253	0.104306	CLU	1
CC	GO:1905286	serine-type peptidase complex	0.0220253	0.104306	PLAUR	1
BP	GO:0032496	response to lipopolysaccharide	0.0226944	0.0806349	PRKCA/TICAM1/NOD2	3
BP	GO:0048545	response to steroid hormone	0.0226944	0.0806349	YWHAH/TP63/GPER1	3
BP	GO:0032612	interleukin-1 production	0.0228083	0.0806349	FZD5/NOD2	2
BP	GO:0032652	regulation of interleukin-1 production	0.0228083	0.0806349	FZD5/NOD2	2
MF	GO:0035259	nuclear glucocorticoid receptor binding	0.0230338	0.107008	YWHAH	1
MF	GO:0060590	ATPase regulator activity	0.0230338	0.107008	BAG3	1
BP	GO:0051208	sequestering of calcium ion	0.0231361	0.0806349	ATP7B/GPER1	2
BP	GO:0003334	keratinocyte development	0.0231391	0.0806349	SFN	1
BP	GO:0032494	response to peptidoglycan	0.0231391	0.0806349	NOD2	1
BP	GO:0032621	interleukin-18 production	0.0231391	0.0806349	NOD2	1
BP	GO:0032661	regulation of interleukin-18 production	0.0231391	0.0806349	NOD2	1
BP	GO:0042921	glucocorticoid receptor signaling pathway	0.0231391	0.0806349	YWHAH	1
BP	GO:0045605	negative regulation of epidermal cell differentiation	0.0231391	0.0806349	TP63	1
BP	GO:0045683	negative regulation of epidermis development	0.0231391	0.0806349	TP63	1
BP	GO:0060670	branching involved in labyrinthine layer morphogenesis	0.0231391	0.0806349	FZD5	1
BP	GO:0061430	bone trabecula morphogenesis	0.0231391	0.0806349	MMP2	1
BP	GO:0071389	cellular response to mineralocorticoid stimulus	0.0231391	0.0806349	GPER1	1
BP	GO:0098792	xenophagy	0.0231391	0.0806349	NOD2	1
BP	GO:0098840	protein transport along microtubule	0.0231391	0.0806349	BAG3	1
BP	GO:0099118	microtubule-based protein transport	0.0231391	0.0806349	BAG3	1
BP	GO:1900452	regulation of long-term synaptic depression	0.0231391	0.0806349	MAPT	1
BP	GO:1901029	negative regulation of mitochondrial outer membrane permeabilization involved in apoptotic signaling pathway	0.0231391	0.0806349	ACAA2	1
BP	GO:1901524	regulation of mitophagy	0.0231391	0.0806349	VPS13C	1
BP	GO:1903599	positive regulation of autophagy of mitochondrion	0.0231391	0.0806349	BNIP3	1
BP	GO:1905065	positive regulation of vascular associated smooth muscle cell differentiation	0.0231391	0.0806349	GPER1	1
BP	GO:0051235	maintenance of location	0.0232195	0.0807511	VPS13C/ATP7B/GPER1	3
BP	GO:0048565	digestive tract development	0.0234659	0.0814433	FZD5/TP63	2
CC	GO:0030673	axolemma	0.0236999	0.104306	MAPT	1
CC	GO:0098637	protein complex involved in cell-matrix adhesion	0.0236999	0.104306	PLAUR	1
MF	GO:0030674	protein-macromolecule adaptor activity	0.023783	0.107008	HIP1R/MAPT/MAP2K1	3
BP	GO:0001101	response to acid chemical	0.0237977	0.0820971	MMP2/FYN	2
BP	GO:0030168	platelet activation	0.0237977	0.0820971	PRKCA/ALOX12	2
BP	GO:1904950	negative regulation of establishment of protein localization	0.0237977	0.0820971	MAPT/BAG3	2
BP	GO:0070661	leukocyte proliferation	0.0242896	0.0835423	CLU/FYN/TICAM1	3
MF	GO:0061629	RNA polymerase II-specific DNA-binding transcription factor binding	0.0243191	0.107008	YWHAH/TP53BP2/IFI27	3
BP	GO:0042476	odontogenesis	0.0244669	0.0835423	TP63/PERP	2
BP	GO:1900180	regulation of protein localization to nucleus	0.0244669	0.0835423	FYN/BAG3	2
MF	GO:0016004	phospholipase activator activity	0.0247841	0.107008	FYN	1
CC	GO:0031674	I band	0.0248269	0.104306	BAG3/CRYAB	2
BP	GO:0002756	MyD88-independent toll-like receptor signaling pathway	0.0248974	0.0835423	TICAM1	1
BP	GO:0031958	corticosteroid receptor signaling pathway	0.0248974	0.0835423	YWHAH	1
BP	GO:0034111	negative regulation of homotypic cell-cell adhesion	0.0248974	0.0835423	ALOX12	1
BP	GO:0035791	platelet-derived growth factor receptor-beta signaling pathway	0.0248974	0.0835423	HIP1R	1
BP	GO:0050966	detection of mechanical stimulus involved in sensory perception of pain	0.0248974	0.0835423	FYN	1
BP	GO:0060732	positive regulation of inositol phosphate biosynthetic process	0.0248974	0.0835423	GPER1	1
BP	GO:0071888	macrophage apoptotic process	0.0248974	0.0835423	NOD2	1
BP	GO:0072350	tricarboxylic acid metabolic process	0.0248974	0.0835423	ACO1	1
BP	GO:1902043	positive regulation of extrinsic apoptotic signaling pathway via death domain receptors	0.0248974	0.0835423	PMAIP1	1
BP	GO:1902947	regulation of tau-protein kinase activity	0.0248974	0.0835423	CLU	1
BP	GO:1904925	positive regulation of autophagy of mitochondrion in response to mitochondrial depolarization	0.0248974	0.0835423	VPS13C	1
BP	GO:0031346	positive regulation of cell projection organization	0.0250178	0.0837829	MAPT/MAP2K1/FYN	3
BP	GO:0061041	regulation of wound healing	0.025144	0.0838783	PLAUR/ALOX12	2
BP	GO:1903322	positive regulation of protein modification by small protein conjugation or removal	0.025144	0.0838783	TICAM1/NOD2	2
MF	GO:0004713	protein tyrosine kinase activity	0.0252522	0.107008	MAP2K1/FYN	2
CC	GO:0032591	dendritic spine membrane	0.0253718	0.104306	GPER1	1
CC	GO:0097440	apical dendrite	0.0253718	0.104306	CLU	1
BP	GO:0006997	nucleus organization	0.0258286	0.0858289	PRKCA/GPER1	2
BP	GO:0008277	regulation of G protein-coupled receptor signaling pathway	0.0258286	0.0858289	PRKCA/GPER1	2
BP	GO:0048813	dendrite morphogenesis	0.0261738	0.0858985	YWHAH/FYN	2
CC	GO:0097060	synaptic membrane	0.0264445	0.105778	HIP1R/GPER1/CRYAB	3
BP	GO:0070555	response to interleukin-1	0.0265209	0.0858985	MMP2/PRKCA	2
MF	GO:0004467	long-chain fatty acid-CoA ligase activity	0.0265314	0.107008	ACSL5	1
MF	GO:0042813	Wnt receptor activity	0.0265314	0.107008	FZD5	1
MF	GO:0097153	cysteine-type endopeptidase activity involved in apoptotic process	0.0265314	0.107008	CASP7	1
MF	GO:0102991	myristoyl-CoA hydrolase activity	0.0265314	0.107008	ACAA2	1
BP	GO:0002468	dendritic cell antigen processing and presentation	0.0266525	0.0858985	NOD2	1
BP	GO:0007567	parturition	0.0266525	0.0858985	MMP2	1
BP	GO:0010838	positive regulation of keratinocyte proliferation	0.0266525	0.0858985	TP63	1
BP	GO:0032897	negative regulation of viral transcription	0.0266525	0.0858985	TRIM31	1
BP	GO:0033147	negative regulation of intracellular estrogen receptor signaling pathway	0.0266525	0.0858985	TP63	1
BP	GO:0048308	organelle inheritance	0.0266525	0.0858985	MAP2K1	1
BP	GO:0048311	mitochondrion distribution	0.0266525	0.0858985	MAPT	1
BP	GO:0048313	Golgi inheritance	0.0266525	0.0858985	MAP2K1	1
BP	GO:0060572	morphogenesis of an epithelial bud	0.0266525	0.0858985	TP63	1
BP	GO:0060576	intestinal epithelial cell development	0.0266525	0.0858985	FZD5	1
BP	GO:0071639	positive regulation of monocyte chemotactic protein-1 production	0.0266525	0.0858985	NOD2	1
BP	GO:0106070	regulation of adenylate cyclase-activating G protein-coupled receptor signaling pathway	0.0266525	0.0858985	PRKCA	1
BP	GO:1900426	positive regulation of defense response to bacterium	0.0266525	0.0858985	NOD2	1
BP	GO:1904923	regulation of autophagy of mitochondrion in response to mitochondrial depolarization	0.0266525	0.0858985	VPS13C	1
BP	GO:0002831	regulation of response to biotic stimulus	0.0266995	0.0858985	PRKCA/FYN/NOD2	3
BP	GO:0008544	epidermis development	0.0268901	0.0863498	MAP2K1/TP63/SFN	3
BP	GO:0046165	alcohol biosynthetic process	0.0272206	0.0872483	GPER1/ACAA2	2
BP	GO:0002449	lymphocyte mediated immunity	0.0278539	0.0882444	CLU/FZD5/NOD2	3
BP	GO:0014065	phosphatidylinositol 3-kinase signaling	0.0279279	0.0882444	DCN/GPER1	2
BP	GO:0045089	positive regulation of innate immune response	0.0279279	0.0882444	FYN/NOD2	2
MF	GO:0004698	calcium-dependent protein kinase C activity	0.0282757	0.107008	PRKCA	1
MF	GO:0005159	insulin-like growth factor receptor binding	0.0282757	0.107008	YWHAH	1
MF	GO:0005521	lamin binding	0.0282757	0.107008	IFI27	1
MF	GO:0050700	CARD domain binding	0.0282757	0.107008	NOD2	1
BP	GO:0001508	action potential	0.0282843	0.0882444	YWHAH/GPER1	2
BP	GO:0006825	copper ion transport	0.0284046	0.0882444	ATP7B	1
BP	GO:0006828	manganese ion transport	0.0284046	0.0882444	SLC39A8	1
BP	GO:0006878	cellular copper ion homeostasis	0.0284046	0.0882444	ATP7B	1
BP	GO:0010919	regulation of inositol phosphate biosynthetic process	0.0284046	0.0882444	GPER1	1
BP	GO:0034112	positive regulation of homotypic cell-cell adhesion	0.0284046	0.0882444	PLAUR	1
BP	GO:0034349	glial cell apoptotic process	0.0284046	0.0882444	PRKCA	1
BP	GO:0043517	positive regulation of DNA damage response, signal transduction by p53 class mediator	0.0284046	0.0882444	PMAIP1	1
BP	GO:0045651	positive regulation of macrophage differentiation	0.0284046	0.0882444	PRKCA	1
BP	GO:0048268	clathrin coat assembly	0.0284046	0.0882444	HIP1R	1
BP	GO:0070431	nucleotide-binding oligomerization domain containing 2 signaling pathway	0.0284046	0.0882444	NOD2	1
BP	GO:1900044	regulation of protein K63-linked ubiquitination	0.0284046	0.0882444	NOD2	1
BP	GO:1900747	negative regulation of vascular endothelial growth factor signaling pathway	0.0284046	0.0882444	DCN	1
BP	GO:1905664	regulation of calcium ion import across plasma membrane	0.0284046	0.0882444	FYN	1
CC	GO:0043204	perikaryon	0.0284743	0.1109	FZD5/CRYAB	2
BP	GO:0035296	regulation of tube diameter	0.0286426	0.0886629	MMP2/GPER1	2
BP	GO:0097746	blood vessel diameter maintenance	0.0286426	0.0886629	MMP2/GPER1	2
BP	GO:0051098	regulation of binding	0.0288361	0.0891016	PLAUR/HIP1R/TICAM1	3
BP	GO:0035150	regulation of tube size	0.0290027	0.0893939	MMP2/GPER1	2
BP	GO:1901653	cellular response to peptide	0.0290348	0.0893939	FYN/GPER1/NOD2	3
MF	GO:0015631	tubulin binding	0.0290426	0.107008	MAPT/FYN/CRYAB	3
BP	GO:0002460	adaptive immune response based on somatic recombination of immune receptors built from immunoglobulin superfamily domains	0.0294343	0.0904619	CLU/FZD5/NOD2	3
BP	GO:0001890	placenta development	0.0297283	0.0908843	FZD5/MAP2K1	2
MF	GO:0004697	protein kinase C activity	0.030017	0.107008	PRKCA	1
MF	GO:0016290	palmitoyl-CoA hydrolase activity	0.030017	0.107008	ACAA2	1
MF	GO:0060229	lipase activator activity	0.030017	0.107008	FYN	1
BP	GO:0006895	Golgi to endosome transport	0.0301537	0.0908843	VPS13C	1
BP	GO:0016045	detection of bacterium	0.0301537	0.0908843	NOD2	1
BP	GO:0034134	toll-like receptor 2 signaling pathway	0.0301537	0.0908843	NOD2	1
BP	GO:0036342	post-anal tail morphogenesis	0.0301537	0.0908843	TP63	1
BP	GO:0044539	long-chain fatty acid import into cell	0.0301537	0.0908843	ACSL5	1
BP	GO:0090083	regulation of inclusion body assembly	0.0301537	0.0908843	CLU	1
BP	GO:1900034	regulation of cellular response to heat	0.0301537	0.0908843	MAPT	1
BP	GO:1902916	positive regulation of protein polyubiquitination	0.0301537	0.0908843	NOD2	1
BP	GO:1903358	regulation of Golgi organization	0.0301537	0.0908843	MAP2K1	1
BP	GO:2001267	regulation of cysteine-type endopeptidase activity involved in apoptotic signaling pathway	0.0301537	0.0908843	PLAUR	1
BP	GO:0002697	regulation of immune effector process	0.0302422	0.0909916	FZD5/TICAM1/NOD2	3
BP	GO:0018108	peptidyl-tyrosine phosphorylation	0.0304461	0.0911715	MAP2K1/FYN/NOD2	3
BP	GO:0007043	cell-cell junction assembly	0.0304613	0.0911715	PRKCA/FZD5	2
BP	GO:0062013	positive regulation of small molecule metabolic process	0.0304613	0.0911715	PMAIP1/GPER1	2
BP	GO:0018212	peptidyl-tyrosine modification	0.0308559	0.0921921	MAP2K1/FYN/NOD2	3
BP	GO:0010675	regulation of cellular carbohydrate metabolic process	0.0315742	0.0924039	PMAIP1/GPER1	2
BP	GO:0050871	positive regulation of B cell activation	0.0315742	0.0924039	TICAM1/NOD2	2
MF	GO:0004708	MAP kinase kinase activity	0.0317552	0.107008	MAP2K1	1
MF	GO:0034185	apolipoprotein binding	0.0317552	0.107008	MAPT	1
MF	GO:0035615	clathrin adaptor activity	0.0317552	0.107008	HIP1R	1
MF	GO:0042834	peptidoglycan binding	0.0317552	0.107008	NOD2	1
BP	GO:0001696	gastric acid secretion	0.0318997	0.0924039	HIP1R	1
BP	GO:0001956	positive regulation of neurotransmitter secretion	0.0318997	0.0924039	GPER1	1
BP	GO:0002830	positive regulation of type 2 immune response	0.0318997	0.0924039	NOD2	1
BP	GO:0010755	regulation of plasminogen activation	0.0318997	0.0924039	PLAUR	1
BP	GO:0019896	axonal transport of mitochondrion	0.0318997	0.0924039	MAPT	1
BP	GO:0030540	female genitalia development	0.0318997	0.0924039	TP63	1
BP	GO:0033033	negative regulation of myeloid cell apoptotic process	0.0318997	0.0924039	NOD2	1
BP	GO:0043217	myelin maintenance	0.0318997	0.0924039	CLU	1
BP	GO:0045780	positive regulation of bone resorption	0.0318997	0.0924039	PRKCA	1
BP	GO:0048569	post-embryonic animal organ development	0.0318997	0.0924039	FZD5	1
BP	GO:0050665	hydrogen peroxide biosynthetic process	0.0318997	0.0924039	FYN	1
BP	GO:0051770	positive regulation of nitric-oxide synthase biosynthetic process	0.0318997	0.0924039	NOD2	1
BP	GO:0051917	regulation of fibrinolysis	0.0318997	0.0924039	PLAUR	1
BP	GO:1902001	fatty acid transmembrane transport	0.0318997	0.0924039	ACSL5	1
BP	GO:1902548	negative regulation of cellular response to vascular endothelial growth factor stimulus	0.0318997	0.0924039	DCN	1
BP	GO:2000641	regulation of early endosome to late endosome transport	0.0318997	0.0924039	MAP2K1	1
BP	GO:0050770	regulation of axonogenesis	0.0319487	0.0924039	MAPT/MAP2K1	2
BP	GO:0007189	adenylate cyclase-activating G protein-coupled receptor signaling pathway	0.032325	0.0933351	PRKCA/GPER1	2
CC	GO:0005769	early endosome	0.033356	0.124954	FZD5/MAP2K1/GPER1	3
BP	GO:1904062	regulation of cation transmembrane transport	0.0333766	0.0944412	YWHAH/FYN/GPER1	3
MF	GO:0140312	cargo adaptor activity	0.0334904	0.107008	HIP1R	1
BP	GO:0002281	macrophage activation involved in immune response	0.0336426	0.0944412	TICAM1	1
BP	GO:0002923	regulation of humoral immune response mediated by circulating immunoglobulin	0.0336426	0.0944412	NOD2	1
BP	GO:0010544	negative regulation of platelet activation	0.0336426	0.0944412	ALOX12	1
BP	GO:0010663	positive regulation of striated muscle cell apoptotic process	0.0336426	0.0944412	BNIP3	1
BP	GO:0010666	positive regulation of cardiac muscle cell apoptotic process	0.0336426	0.0944412	BNIP3	1
BP	GO:0032695	negative regulation of interleukin-12 production	0.0336426	0.0944412	NOD2	1
BP	GO:0032930	positive regulation of superoxide anion generation	0.0336426	0.0944412	MAPT	1
BP	GO:0035338	long-chain fatty-acyl-CoA biosynthetic process	0.0336426	0.0944412	ACSL5	1
BP	GO:0046782	regulation of viral transcription	0.0336426	0.0944412	TRIM31	1
BP	GO:0051152	positive regulation of smooth muscle cell differentiation	0.0336426	0.0944412	GPER1	1
BP	GO:0055070	copper ion homeostasis	0.0336426	0.0944412	ATP7B	1
BP	GO:0060438	trachea development	0.0336426	0.0944412	MAP2K1	1
BP	GO:0090043	regulation of tubulin deacetylation	0.0336426	0.0944412	MAPT	1
BP	GO:0097202	activation of cysteine-type endopeptidase activity	0.0336426	0.0944412	PERP	1
BP	GO:0140354	lipid import into cell	0.0336426	0.0944412	ACSL5	1
BP	GO:2000369	regulation of clathrin-dependent endocytosis	0.0336426	0.0944412	HIP1R	1
CC	GO:0031225	anchored component of membrane	0.0337715	0.124954	PLAUR/NOD2	2
BP	GO:0002253	activation of immune response	0.0340233	0.095354	CLU/FYN/NOD2	3
BP	GO:0007034	vacuolar transport	0.0342329	0.0956501	VPS13C/CLU	2
BP	GO:0050900	leukocyte migration	0.0342403	0.0956501	MMP2/FYN/NOD2	3
BP	GO:0035966	response to topologically incorrect protein	0.0346197	0.0957278	CLU/BAG3	2
BP	GO:0006631	fatty acid metabolic process	0.0346765	0.0957278	ACSL5/ALOX12/ACAA2	3
BP	GO:0051251	positive regulation of lymphocyte activation	0.0346765	0.0957278	FYN/TICAM1/NOD2	3
CC	GO:0031252	cell leading edge	0.0347999	0.125619	HIP1R/MAPT/GPER1	3
BP	GO:0030856	regulation of epithelial cell differentiation	0.0350082	0.0957278	TP63/SFN	2
MF	GO:0015662	P-type ion transporter activity	0.0352226	0.107008	ATP7B	1
MF	GO:0016408	C-acyltransferase activity	0.0352226	0.107008	ACAA2	1
MF	GO:0035173	histone kinase activity	0.0352226	0.107008	PRKCA	1
BP	GO:0002577	regulation of antigen processing and presentation	0.0353825	0.0957278	NOD2	1
BP	GO:0002888	positive regulation of myeloid leukocyte mediated immunity	0.0353825	0.0957278	TICAM1	1
BP	GO:0006525	arginine metabolic process	0.0353825	0.0957278	SLC39A8	1
BP	GO:0010288	response to lead ion	0.0353825	0.0957278	MAPT	1
BP	GO:0010310	regulation of hydrogen peroxide metabolic process	0.0353825	0.0957278	FYN	1
BP	GO:0010940	positive regulation of necrotic cell death	0.0353825	0.0957278	BNIP3	1
BP	GO:0032495	response to muramyl dipeptide	0.0353825	0.0957278	NOD2	1
BP	GO:0043691	reverse cholesterol transport	0.0353825	0.0957278	CLU	1
BP	GO:0060716	labyrinthine layer blood vessel development	0.0353825	0.0957278	FZD5	1
BP	GO:0098543	detection of other organism	0.0353825	0.0957278	NOD2	1
BP	GO:1900221	regulation of amyloid-beta clearance	0.0353825	0.0957278	CLU	1
BP	GO:1902004	positive regulation of amyloid-beta formation	0.0353825	0.0957278	CLU	1
BP	GO:1902473	regulation of protein localization to synapse	0.0353825	0.0957278	MAPT	1
BP	GO:1903427	negative regulation of reactive oxygen species biosynthetic process	0.0353825	0.0957278	FYN	1
BP	GO:1905209	positive regulation of cardiocyte differentiation	0.0353825	0.0957278	GPER1	1
BP	GO:2000269	regulation of fibroblast apoptotic process	0.0353825	0.0957278	TP63	1
BP	GO:0030307	positive regulation of cell growth	0.0361841	0.0977425	MAPT/SFN	2
BP	GO:0010970	transport along microtubule	0.0365794	0.0986553	MAPT/BAG3	2
BP	GO:0034755	iron ion transmembrane transport	0.0371194	0.0988699	SLC39A8	1
BP	GO:0043651	linoleic acid metabolic process	0.0371194	0.0988699	ALOX12	1
BP	GO:0071498	cellular response to fluid shear stress	0.0371194	0.0988699	MMP2	1
BP	GO:0071605	monocyte chemotactic protein-1 production	0.0371194	0.0988699	NOD2	1
BP	GO:0071637	regulation of monocyte chemotactic protein-1 production	0.0371194	0.0988699	NOD2	1
BP	GO:0090201	negative regulation of release of cytochrome c from mitochondria	0.0371194	0.0988699	CLU	1
BP	GO:0097062	dendritic spine maintenance	0.0371194	0.0988699	FYN	1
BP	GO:0098780	response to mitochondrial depolarisation	0.0371194	0.0988699	VPS13C	1
CC	GO:0062023	collagen-containing extracellular matrix	0.0373504	0.131616	MMP2/CLU/DCN	3
BP	GO:0034250	positive regulation of cellular amide metabolic process	0.0373752	0.0993971	CLU/NOD2	2
BP	GO:0016482	cytosolic transport	0.0377756	0.100075	VPS13C/MAP2K1	2
BP	GO:0007159	leukocyte cell-cell adhesion	0.0378117	0.100075	FYN/SLC39A8/NOD2	3
BP	GO:0050727	regulation of inflammatory response	0.0378117	0.100075	FYN/GPER1/NOD2	3
BP	GO:1905475	regulation of protein localization to membrane	0.0381776	0.100075	FYN/GPER1	2
MF	GO:0004252	serine-type endopeptidase activity	0.0386397	0.107008	MMP2/MMP1	2
CC	GO:0031430	M band	0.0386467	0.133017	CRYAB	1
MF	GO:0005385	zinc ion transmembrane transporter activity	0.038678	0.107008	SLC39A8	1
MF	GO:0009931	calcium-dependent protein serine/threonine kinase activity	0.038678	0.107008	PRKCA	1
MF	GO:0015106	bicarbonate transmembrane transporter activity	0.038678	0.107008	SLC39A8	1
MF	GO:0015645	fatty acid ligase activity	0.038678	0.107008	ACSL5	1
MF	GO:0030021	extracellular matrix structural constituent conferring compression resistance	0.038678	0.107008	DCN	1
MF	GO:0050321	tau-protein kinase activity	0.038678	0.107008	FYN	1
BP	GO:0002070	epithelial cell maturation	0.0388532	0.100075	FZD5	1
BP	GO:0002223	stimulatory C-type lectin receptor signaling pathway	0.0388532	0.100075	FYN	1
BP	GO:0007351	tripartite regional subdivision	0.0388532	0.100075	FZD5	1
BP	GO:0008595	anterior/posterior axis specification, embryo	0.0388532	0.100075	FZD5	1
BP	GO:0030277	maintenance of gastrointestinal epithelium	0.0388532	0.100075	NOD2	1
BP	GO:0030728	ovulation	0.0388532	0.100075	MMP2	1
BP	GO:0032928	regulation of superoxide anion generation	0.0388532	0.100075	MAPT	1
BP	GO:0046597	negative regulation of viral entry into host cell	0.0388532	0.100075	TRIM31	1
BP	GO:0048485	sympathetic nervous system development	0.0388532	0.100075	TP63	1
BP	GO:0051767	nitric-oxide synthase biosynthetic process	0.0388532	0.100075	NOD2	1
BP	GO:0051769	regulation of nitric-oxide synthase biosynthetic process	0.0388532	0.100075	NOD2	1
BP	GO:0060713	labyrinthine layer morphogenesis	0.0388532	0.100075	FZD5	1
BP	GO:0090042	tubulin deacetylation	0.0388532	0.100075	MAPT	1
BP	GO:1900424	regulation of defense response to bacterium	0.0388532	0.100075	NOD2	1
BP	GO:1990840	response to lectin	0.0388532	0.100075	FYN	1
BP	GO:1990858	cellular response to lectin	0.0388532	0.100075	FYN	1
BP	GO:2000810	regulation of bicellular tight junction assembly	0.0388532	0.100075	FZD5	1
BP	GO:0048660	regulation of smooth muscle cell proliferation	0.0393937	0.101315	MMP2/GPER1	2
BP	GO:0001558	regulation of cell growth	0.0396671	0.101757	MAPT/SFN/CRYAB	3
BP	GO:0032635	interleukin-6 production	0.0398024	0.101757	TICAM1/NOD2	2
BP	GO:0032675	regulation of interleukin-6 production	0.0398024	0.101757	TICAM1/NOD2	2
BP	GO:1902905	positive regulation of supramolecular fiber organization	0.0398024	0.101757	MAPT/CLU	2
BP	GO:0010959	regulation of metal ion transport	0.0399022	0.10186	YWHAH/FYN/GPER1	3
MF	GO:0004175	endopeptidase activity	0.0400884	0.107008	MMP2/MMP1/CASP7	3
CC	GO:0031307	integral component of mitochondrial outer membrane	0.0402937	0.134931	BNIP3	1
MF	GO:0005212	structural constituent of eye lens	0.0404011	0.107008	CRYAB	1
MF	GO:0010857	calcium-dependent protein kinase activity	0.0404011	0.107008	PRKCA	1
MF	GO:0043274	phospholipase binding	0.0404011	0.107008	FYN	1
MF	GO:0047617	acyl-CoA hydrolase activity	0.0404011	0.107008	ACAA2	1
BP	GO:0044827	modulation by host of viral genome replication	0.040584	0.103092	IFI27	1
BP	GO:0048143	astrocyte activation	0.040584	0.103092	MAPT	1
BP	GO:0051131	chaperone-mediated protein complex assembly	0.040584	0.103092	CLU	1
BP	GO:0048015	phosphatidylinositol-mediated signaling	0.0406246	0.103092	DCN/GPER1	2
BP	GO:0002706	regulation of lymphocyte mediated immunity	0.0410381	0.103682	FZD5/NOD2	2
BP	GO:0048659	smooth muscle cell proliferation	0.0410381	0.103682	MMP2/GPER1	2
BP	GO:0048771	tissue remodeling	0.0410381	0.103682	MMP2/PRKCA	2
MF	GO:1901981	phosphatidylinositol phosphate binding	0.041086	0.107008	HIP1R/MAPT	2
CC	GO:0030057	desmosome	0.041938	0.134931	PERP	1
CC	GO:0031306	intrinsic component of mitochondrial outer membrane	0.041938	0.134931	BNIP3	1
BP	GO:0050808	synapse organization	0.0420512	0.103994	MAPT/FZD5/FYN	3
MF	GO:0003707	nuclear steroid receptor activity	0.0421213	0.107008	GPER1	1
MF	GO:0016702	oxidoreductase activity, acting on single donors with incorporation of molecular oxygen, incorporation of two atoms of oxygen	0.0421213	0.107008	ALOX12	1
MF	GO:0050750	low-density lipoprotein particle receptor binding	0.0421213	0.107008	CLU	1
MF	GO:0140358	P-type transmembrane transporter activity	0.0421213	0.107008	ATP7B	1
BP	GO:0002822	regulation of adaptive immune response based on somatic recombination of immune receptors built from immunoglobulin superfamily domains	0.0422883	0.103994	FZD5/NOD2	2
BP	GO:0048017	inositol lipid-mediated signaling	0.0422883	0.103994	DCN/GPER1	2
BP	GO:0097553	calcium ion transmembrane import into cytosol	0.0422883	0.103994	FYN/GPER1	2
BP	GO:0006869	lipid transport	0.0422935	0.103994	VPS13C/CLU/ACSL5	3
BP	GO:0002922	positive regulation of humoral immune response	0.0423117	0.103994	NOD2	1
BP	GO:0006925	inflammatory cell apoptotic process	0.0423117	0.103994	NOD2	1
BP	GO:0010640	regulation of platelet-derived growth factor receptor signaling pathway	0.0423117	0.103994	HIP1R	1
BP	GO:0010839	negative regulation of keratinocyte proliferation	0.0423117	0.103994	SFN	1
BP	GO:0022010	central nervous system myelination	0.0423117	0.103994	CLU	1
BP	GO:0030859	polarized epithelial cell differentiation	0.0423117	0.103994	TP63	1
BP	GO:0032291	axon ensheathment in central nervous system	0.0423117	0.103994	CLU	1
BP	GO:0036120	cellular response to platelet-derived growth factor stimulus	0.0423117	0.103994	FYN	1
BP	GO:0051590	positive regulation of neurotransmitter transport	0.0423117	0.103994	GPER1	1
BP	GO:0060571	morphogenesis of an epithelial fold	0.0423117	0.103994	TP63	1
BP	GO:0060706	cell differentiation involved in embryonic placenta development	0.0423117	0.103994	FZD5	1
BP	GO:1990961	xenobiotic detoxification by transmembrane export across the plasma membrane	0.0423117	0.103994	ATP7B	1
BP	GO:2000353	positive regulation of endothelial cell apoptotic process	0.0423117	0.103994	GPER1	1
BP	GO:2000637	positive regulation of miRNA-mediated gene silencing	0.0423117	0.103994	MAP2K1	1
MF	GO:0008237	metallopeptidase activity	0.0427489	0.107008	MMP2/MMP1	2
BP	GO:0007409	axonogenesis	0.043516	0.104785	MAPT/MAP2K1/FYN	3
CC	GO:0031045	dense core granule	0.0435795	0.136578	VPS13C	1
MF	GO:0015296	anion:cation symporter activity	0.0438385	0.107008	SLC39A8	1
MF	GO:0016289	CoA hydrolase activity	0.0438385	0.107008	ACAA2	1
MF	GO:0016701	oxidoreductase activity, acting on single donors with incorporation of molecular oxygen	0.0438385	0.107008	ALOX12	1
BP	GO:0006109	regulation of carbohydrate metabolic process	0.0439776	0.104785	PMAIP1/GPER1	2
BP	GO:0043405	regulation of MAP kinase activity	0.0439776	0.104785	FZD5/NOD2	2
BP	GO:0008211	glucocorticoid metabolic process	0.0440365	0.104785	YWHAH	1
BP	GO:0018904	ether metabolic process	0.0440365	0.104785	ALOX12	1
BP	GO:0021697	cerebellar cortex formation	0.0440365	0.104785	MAP2K1	1
BP	GO:0032816	positive regulation of natural killer cell activation	0.0440365	0.104785	TICAM1	1
BP	GO:0035336	long-chain fatty-acyl-CoA metabolic process	0.0440365	0.104785	ACSL5	1
BP	GO:0045649	regulation of macrophage differentiation	0.0440365	0.104785	PRKCA	1
BP	GO:0046716	muscle cell cellular homeostasis	0.0440365	0.104785	BAG3	1
BP	GO:0046949	fatty-acyl-CoA biosynthetic process	0.0440365	0.104785	ACSL5	1
BP	GO:0051560	mitochondrial calcium ion homeostasis	0.0440365	0.104785	BNIP3	1
BP	GO:0051788	response to misfolded protein	0.0440365	0.104785	CLU	1
BP	GO:0060148	positive regulation of post-transcriptional gene silencing	0.0440365	0.104785	MAP2K1	1
BP	GO:0060575	intestinal epithelial cell differentiation	0.0440365	0.104785	FZD5	1
BP	GO:0062149	detection of stimulus involved in sensory perception of pain	0.0440365	0.104785	FYN	1
BP	GO:0070423	nucleotide-binding oligomerization domain containing signaling pathway	0.0440365	0.104785	NOD2	1
BP	GO:0071577	zinc ion transmembrane transport	0.0440365	0.104785	SLC39A8	1
BP	GO:0098581	detection of external biotic stimulus	0.0440365	0.104785	NOD2	1
BP	GO:1900370	positive regulation of post-transcriptional gene silencing by RNA	0.0440365	0.104785	MAP2K1	1
BP	GO:1902993	positive regulation of amyloid precursor protein catabolic process	0.0440365	0.104785	CLU	1
BP	GO:1905063	regulation of vascular associated smooth muscle cell differentiation	0.0440365	0.104785	GPER1	1
BP	GO:2000193	positive regulation of fatty acid transport	0.0440365	0.104785	ACSL5	1
BP	GO:0002221	pattern recognition receptor signaling pathway	0.0444038	0.105513	TICAM1/NOD2	2
BP	GO:0042060	wound healing	0.0445069	0.105612	PLAUR/PRKCA/ALOX12	3
BP	GO:0061138	morphogenesis of a branching epithelium	0.0448316	0.105804	FZD5/TP63	2
BP	GO:1903169	regulation of calcium ion transmembrane transport	0.0448316	0.105804	FYN/GPER1	2
CC	GO:0030662	coated vesicle membrane	0.0449989	0.136578	HIP1R/FZD5	2
CC	GO:0034364	high-density lipoprotein particle	0.0452183	0.136578	CLU	1
MF	GO:0004190	aspartic-type endopeptidase activity	0.0455527	0.107008	CASP7	1
MF	GO:0015295	solute:proton symporter activity	0.0455527	0.107008	SLC39A8	1
BP	GO:0050777	negative regulation of immune response	0.0456919	0.105804	FYN/NOD2	2
BP	GO:0051302	regulation of cell division	0.0456919	0.105804	TP63/SFN	2
BP	GO:0002433	immune response-regulating cell surface receptor signaling pathway involved in phagocytosis	0.0457582	0.105804	FYN	1
BP	GO:0002726	positive regulation of T cell cytokine production	0.0457582	0.105804	FZD5	1
BP	GO:0006706	steroid catabolic process	0.0457582	0.105804	YWHAH	1
BP	GO:0034643	establishment of mitochondrion localization, microtubule-mediated	0.0457582	0.105804	MAPT	1
BP	GO:0035872	nucleotide-binding domain, leucine rich repeat containing receptor signaling pathway	0.0457582	0.105804	NOD2	1
BP	GO:0036119	response to platelet-derived growth factor	0.0457582	0.105804	FYN	1
BP	GO:0038096	Fc-gamma receptor signaling pathway involved in phagocytosis	0.0457582	0.105804	FYN	1
BP	GO:0046629	gamma-delta T cell activation	0.0457582	0.105804	NOD2	1
BP	GO:0047497	mitochondrion transport along microtubule	0.0457582	0.105804	MAPT	1
BP	GO:0048596	embryonic camera-type eye morphogenesis	0.0457582	0.105804	FZD5	1
BP	GO:0060343	trabecula formation	0.0457582	0.105804	MMP2	1
BP	GO:0060669	embryonic placenta morphogenesis	0.0457582	0.105804	FZD5	1
BP	GO:0097186	amelogenesis	0.0457582	0.105804	PERP	1
BP	GO:1903798	regulation of miRNA maturation	0.0457582	0.105804	MAP2K1	1
BP	GO:1903901	negative regulation of viral life cycle	0.0457582	0.105804	TRIM31	1
MF	GO:0008236	serine-type peptidase activity	0.0461496	0.107008	MMP2/MMP1	2
BP	GO:0002683	negative regulation of immune system process	0.0462683	0.10684	FYN/GPER1/NOD2	3
BP	GO:0002696	positive regulation of leukocyte activation	0.0465227	0.107221	FYN/TICAM1/NOD2	3
BP	GO:0031099	regeneration	0.0465583	0.107221	MMP2/MAP2K1	2
BP	GO:0050731	positive regulation of peptidyl-tyrosine phosphorylation	0.0469938	0.107323	FYN/NOD2	2
MF	GO:0016405	CoA-ligase activity	0.0472639	0.107008	ACSL5	1
MF	GO:0038187	pattern recognition receptor activity	0.0472639	0.107008	NOD2	1
MF	GO:0070001	aspartic-type peptidase activity	0.0472639	0.107008	CASP7	1
MF	GO:0080025	phosphatidylinositol-3,5-bisphosphate binding	0.0472639	0.107008	HIP1R	1
BP	GO:0009060	aerobic respiration	0.0474308	0.107323	ACO1/BNIP3	2
BP	GO:0031345	negative regulation of cell projection organization	0.0474308	0.107323	YWHAH/FYN	2
BP	GO:0002710	negative regulation of T cell mediated immunity	0.0474769	0.107323	NOD2	1
BP	GO:0007350	blastoderm segmentation	0.0474769	0.107323	FZD5	1
BP	GO:0030262	apoptotic nuclear changes	0.0474769	0.107323	GPER1	1
BP	GO:0031639	plasminogen activation	0.0474769	0.107323	PLAUR	1
BP	GO:0032740	positive regulation of interleukin-17 production	0.0474769	0.107323	NOD2	1
BP	GO:0042026	protein refolding	0.0474769	0.107323	CRYAB	1
BP	GO:0042730	fibrinolysis	0.0474769	0.107323	PLAUR	1
BP	GO:0046618	xenobiotic export from cell	0.0474769	0.107323	ATP7B	1
BP	GO:1900746	regulation of vascular endothelial growth factor signaling pathway	0.0474769	0.107323	DCN	1
BP	GO:1902932	positive regulation of alcohol biosynthetic process	0.0474769	0.107323	GPER1	1
BP	GO:2000647	negative regulation of stem cell proliferation	0.0474769	0.107323	SFN	1
BP	GO:0003012	muscle system process	0.0478056	0.107924	PRKCA/GPER1/CRYAB	3
BP	GO:0032872	regulation of stress-activated MAPK cascade	0.0478694	0.107926	MAP2K1/NOD2	2
MF	GO:0017171	serine hydrolase activity	0.0478866	0.107008	MMP2/MMP1	2
BP	GO:0007369	gastrulation	0.0483094	0.108771	MMP2/MAP2K1	2
BP	GO:0002227	innate immune response in mucosa	0.0491926	0.108771	NOD2	1
BP	GO:0006829	zinc ion transport	0.0491926	0.108771	SLC39A8	1
BP	GO:0030878	thyroid gland development	0.0491926	0.108771	MAP2K1	1
BP	GO:0031664	regulation of lipopolysaccharide-mediated signaling pathway	0.0491926	0.108771	PRKCA	1
BP	GO:0032703	negative regulation of interleukin-2 production	0.0491926	0.108771	NOD2	1
BP	GO:0032958	inositol phosphate biosynthetic process	0.0491926	0.108771	GPER1	1
BP	GO:0034063	stress granule assembly	0.0491926	0.108771	MAPT	1
BP	GO:0035116	embryonic hindlimb morphogenesis	0.0491926	0.108771	TP63	1
BP	GO:0045606	positive regulation of epidermal cell differentiation	0.0491926	0.108771	SFN	1
BP	GO:0070920	regulation of production of small RNA involved in gene silencing by RNA	0.0491926	0.108771	MAP2K1	1
BP	GO:0090314	positive regulation of protein targeting to membrane	0.0491926	0.108771	FYN	1
BP	GO:1903649	regulation of cytoplasmic transport	0.0491926	0.108771	MAP2K1	1
BP	GO:0002819	regulation of adaptive immune response	0.049194	0.108771	FZD5/NOD2	2
BP	GO:0070302	regulation of stress-activated protein kinase signaling cascade	0.049194	0.108771	MAP2K1/NOD2	2
