# Supplementary material for: Identification and validation of biomarkers associated with mitochondria and programmed cell death in Barrett's esophagus
Source: Research Square preprint supplement (doi:10.21203/rs.3.rs-7451895/v1), 2025-09-04
Supplement: Supplementary file 2 [file dd2f0f9667e3138e948c53a9.xlsx]

## Sheet: 03.KEGG
ID	Description	pvalue	p.adjust	geneID	Count
hsa05205	Proteoglycans in cancer	3.44128e-05	0.0058846	PLAUR/MMP2/PRKCA/FZD5/MAP2K1/DCN	6
hsa05219	Bladder cancer	0.000279175	0.0238695	MMP2/MAP2K1/MMP1	3
hsa04926	Relaxin signaling pathway	0.000693032	0.0395028	MMP2/PRKCA/MAP2K1/MMP1	4
hsa04929	GnRH secretion	0.00108728	0.0442277	PRKCA/MAP2K1/GPER1	3
hsa04664	Fc epsilon RI signaling pathway	0.00129321	0.0442277	PRKCA/MAP2K1/FYN	3
hsa04115	p53 signaling pathway	0.00164567	0.0469016	PMAIP1/SFN/PERP	3
hsa04912	GnRH signaling pathway	0.00304456	0.0696382	MMP2/PRKCA/MAP2K1	3
hsa01522	Endocrine resistance	0.00363366	0.0696382	MMP2/MAP2K1/GPER1	3
hsa04916	Melanogenesis	0.00384446	0.0696382	PRKCA/FZD5/MAP2K1	3
hsa05417	Lipid and atherosclerosis	0.00446432	0.0696382	PRKCA/MMP1/CASP7/TICAM1	4
hsa04215	Apoptosis - multiple species	0.00451719	0.0696382	CASP7/PMAIP1	2
hsa04725	Cholinergic synapse	0.00553012	0.0696382	PRKCA/MAP2K1/FYN	3
hsa04726	Serotonergic synapse	0.00553012	0.0696382	PRKCA/MAP2K1/ALOX12	3
hsa04668	TNF signaling pathway	0.00608143	0.0696382	MAP2K1/CASP7/NOD2	3
hsa04960	Aldosterone-regulated sodium reabsorption	0.00632788	0.0696382	PRKCA/SFN	2
hsa04071	Sphingolipid signaling pathway	0.00651586	0.0696382	PRKCA/MAP2K1/FYN	3
hsa05010	Alzheimer disease	0.00696109	0.0700204	MAPT/FZD5/MAP2K1/CASP7/SLC39A8	5
hsa04216	Ferroptosis	0.00768988	0.071547	ACSL5/SLC39A8	2
hsa00071	Fatty acid degradation	0.0080493	0.071547	ACSL5/ACAA2	2
hsa04650	Natural killer cell mediated cytotoxicity	0.00861077	0.071547	PRKCA/MAP2K1/FYN	3
hsa04210	Apoptosis	0.00878648	0.071547	MAP2K1/CASP7/PMAIP1	3
hsa04915	Estrogen signaling pathway	0.00932629	0.0724907	MMP2/MAP2K1/GPER1	3
hsa04072	Phospholipase D signaling pathway	0.0112647	0.0832626	PRKCA/MAP2K1/FYN	3
hsa04390	Hippo signaling pathway	0.0129719	0.0832626	FZD5/YWHAH/TP53BP2	3
hsa04150	mTOR signaling pathway	0.0131952	0.0832626	PRKCA/FZD5/MAP2K1	3
hsa05134	Legionellosis	0.0133845	0.0832626	CASP7/BNIP3	2
hsa05160	Hepatitis C	0.0134207	0.0832626	MAP2K1/YWHAH/TICAM1	3
hsa01212	Fatty acid metabolism	0.0138443	0.0832626	ACSL5/ACAA2	2
hsa05161	Hepatitis B	0.014345	0.0832626	PRKCA/MAP2K1/TICAM1	3
hsa04370	VEGF signaling pathway	0.0152644	0.0832626	PRKCA/MAP2K1	2
hsa04730	Long-term depression	0.0152644	0.0832626	PRKCA/MAP2K1	2
hsa05225	Hepatocellular carcinoma	0.0160483	0.0832626	PRKCA/FZD5/MAP2K1	3
hsa05022	Pathways of neurodegeneration - multiple diseases	0.0164451	0.0832626	PRKCA/MAPT/FZD5/MAP2K1/CASP7	5
hsa05164	Influenza A	0.0165551	0.0832626	PRKCA/MAP2K1/TICAM1	3
hsa04720	Long-term potentiation	0.0188102	0.0919012	PRKCA/MAP2K1	2
hsa05223	Non-small cell lung cancer	0.0220992	0.104473	PRKCA/MAP2K1	2
hsa01524	Platinum drug resistance	0.0232451	0.104473	ATP7B/PMAIP1	2
hsa03320	PPAR signaling pathway	0.0238271	0.104473	ACSL5/MMP1	2
hsa05214	Glioma	0.0238271	0.104473	PRKCA/MAP2K1	2
hsa05133	Pertussis	0.0250092	0.106653	CASP7/TICAM1	2
hsa04510	Focal adhesion	0.0255717	0.106653	PRKCA/MAP2K1/FYN	3
hsa01521	EGFR tyrosine kinase inhibitor resistance	0.026215	0.106732	PRKCA/MAP2K1	2
hsa04012	ErbB signaling pathway	0.0299715	0.118822	PRKCA/MAP2K1	2
hsa05210	Colorectal cancer	0.0306174	0.118822	MAP2K1/PMAIP1	2
hsa04610	Complement and coagulation cascades	0.0312689	0.118822	PLAUR/CLU	2
hsa05235	PD-L1 expression and PD-1 checkpoint pathway in cancer	0.0325885	0.121144	MAP2K1/TICAM1	2
hsa04540	Gap junction	0.03393	0.123447	PRKCA/MAP2K1	2
hsa04666	Fc gamma R-mediated phagocytosis	0.0380821	0.13267	PRKCA/MAP2K1	2
hsa04750	Inflammatory mediator regulation of TRP channels	0.0387924	0.13267	PRKCA/ALOX12	2
hsa05231	Choline metabolism in cancer	0.0387924	0.13267	PRKCA/MAP2K1	2
hsa04933	AGE-RAGE signaling pathway in diabetic complications	0.0402283	0.134883	MMP2/PRKCA	2
hsa04066	HIF-1 signaling pathway	0.0461705	0.148965	PRKCA/MAP2K1	2
hsa04620	Toll-like receptor signaling pathway	0.0461705	0.148965	MAP2K1/TICAM1	2
